# Supplementary material for: Prognostic mutational subtyping in de novo diffuse large B-cell lymphoma
Source: PubMed Central journal article supplement (PMC8892802; doi:10.1186/s12885-022-09237-5), 2022-03-03
Supplement: 12885_2022_9237_MOESM1_ESM.pdf [file 12885_2022_9237_MOESM1_ESM.pdf]

## Supplementary Methods and Results

### **GOYA inclusion criteria**

Included patients had previously untreated, histologically documented, CD20-positive diffuse large B-cell lymphoma (DLBCL); Eastern Cooperative Oncology Group (ECOG) performance status of 0-2; and International Prognostic Index (IPI) score  $\geq 2$ . Patients with an IPI score of 1 and aged  $\leq 60$  years, with or without bulky disease, and those with an IPI score of 0 and bulky disease (i.e. one lesion  $\geq 7.5$  cm) were also included.

### **CAVALLI inclusion criteria**

Included patients had previously untreated, histologically documented B-cell non-Hodgkin lymphoma; at least one bi-dimensionally measurable lesion on computed tomography scan defined as  $>1.5$  cm in its longest dimension; ECOG performance status of 0-2; and IPI score 2-5.

### **Real-world data analysis**

#### ***Flatiron Health-Foundation Medicine Inc clinico-genomic database (FH-FMI CGDB)***

De-identified patient-level clinical data from the electronic health record included structured data (e.g. laboratory values, prescribed drugs) and unstructured data (e.g. detailed biomarkers) collected via technology-enabled chart abstraction of physician's notes and other unstructured documents. De-identified patient-level genomic data included specimen features (e.g. tumor mutation burden, pathologic purity), alteration-level details (e.g. genomic position, reference and alternate alleles, mutant allele count, minor allele frequency), and therapeutic recommendations that were reported to the clinician at the time of testing.

Genomic alterations were identified via comprehensive genomic profiling of  $>300$  cancer-related genes on FMI's next-generation sequencing-based FoundationOne<sup>®</sup> panel. To date, more than 400,000 samples have been sequenced from patients across the US.

Institutional Review Board approval of the study protocol was obtained prior to study conduct. Informed consent was waived as this was a non-interventional study and the anonymized data in the FH-FMI CGDB are protected against breach of confidentiality.

### ***Data analysis***

Only genes that were in the gene clusters identified in GOYA were selected for the analysis. Mutation test results were preprocessed using the same data preparation methods as already described (i.e. mutations were aggregated per gene level with a binary representation of presence or absence, regardless of types and number of mutations on the gene).

The number of clusters and the associations between the genes and the clusters were determined by non-negative matrix factorization (NMF) using the same procedure described in the methods section. Data to derive disease progression based on change in tumor dimensions were not available in the real-world cohort, and other surrogate definitions of disease progression such as change in line of therapy, were also not yet validated. Therefore, survival analysis for each genetic group was only applied with overall survival as the endpoint. Survival time was measured from the initiation of first-line treatment until death. All patients without a death event were censored at the last visit date or last treatment administration date (whichever came last) on or before the end of the study period (December 2019). Kaplan-Meier curves were used to evaluate overall survival from treatment initiation by treatment regimen. Cox proportional hazard models were used to assess the hazard ratio of genetic subgroups with adjustment of age, sex, cell-of-origin (COO) and BCL2 immunohistochemistry (IHC). Due to the high percentage of missing variables, such as ECOG, which were needed for IPI score calculation, we were unable to include IPI score in the multivariate model.

## **Biomarker analyses**

COO classification subgroups were determined for patients with available tissue and centrally confirmed CD20+ DLBCL using the research-use-only version of the NanoString Lymphoma Subtyping Test (LST; NanoString Technologies, Inc., Seattle, USA). Treatment effect was assessed according to the Linear Predictor Score (LPS) from the NanoString LST; this continuous variable provides information on the likelihood of a patient with DLBCL having an activated B-cell-like tumor based on their gene expression profile, and is a standard output of the LST assay.<sup>1</sup> The performance of obinutuzumab (G)-cyclophosphamide, doxorubicin, vincristine, and prednisone (CHOP) vs rituximab (R)-CHOP was evaluated according to LPS quartiles. *BCL2* expression (IHC) and *BCL2* and *MYC* translocations (fluorescence *in situ* hybridization [FISH]) were assayed in pretreatment tumor samples from biomarker-evaluable patients.

Vysis LSI Dual Color Break Apart FISH probes (Abbott Laboratories, Chicago, IL, USA) were used to identify *BCL2* and *MYC* translocations, with FISH+ defined as  $\geq 50\%$  of tumor cells harboring break apart signal. Although there is no standard cut-off defined in the literature, a value of 5% is commonly used. The higher FISH cut-off used here was based on the bimodal distribution of patients in GOYA, which showed clear groupings of patients above 50% and below 12%, with a small number of indeterminate patients between these values. Orthogonal translocation data from sequencing analyses showed these indeterminate patients to in fact be non-translocated, which led to selection of a  $\geq 50\%$  cut-off for this population. The 5% cut-off was used for sensitivity analysis

The H-score was calculated for staining of tumor cells as previously reported by Pfeifer et al,<sup>2</sup> using the following formula:

$$\text{H-Score} = (\% \text{ at } 0) \times 0 + (\% \text{ at } 1+) \times 1 + (\% \text{ at } 2+) \times 2 + (\% \text{ at } 3+) \times 3.$$

## **RNA-Seq post processing**

Quality control of high-throughput transcriptome sequencing was performed. Adapters were trimmed using ea-utils function fastq-mcf (parameters: --max-ns 4 --qual-mean 25 -H -p 5 -q 7 -l 25 -l 25). Trimmed reads were aligned to human genome reference GRCh38 using GSNAP version 2013-10-10 (parameters: -M 2 -n 10 -B 2 -i 1 -N 1 -w 200000 -E 1 --pairmax-rna=200000 --clip-overlap). Exonic gene counts were determined for each sample by leveraging the in-house Genentech RNA-Seq pipeline scripts. Genes and samples were filtered using an internal RNA-Seq processing package (RNAseqTools; parameters: default). To account for sequencing variability, counts were normalized to counts per million. From 553 samples, a total of 538 passed quality control and were used in downstream analyses.

### **Random Forest modelling**

Random Forest modelling was performed via the caret R package, which uses the R package Random Forest. To minimize data set selection biases, one hundred models in GOYA were trained using a random 70% training and 30% holdout/validation scheme. Each individual model was trained using a repeated cross-validation scheme with 5 folds and 5 repeats, and the best mtry hyper-parameter was selected from the range 1 to 15. Overall model performance was assessed with a confusion matrix (**Supplementary Table S2**), and an mtry value of 3 was selected due to greatest frequency of appearance and its strong recapitulation of the original distribution of GOYA NMF groups vis-à-vis the 3-year progression-free survival landmark.

### **RNA expression**

Differential gene expression analysis (Limma-Voom), comparing high-/low-risk molecular subgroups in GOYA, showed 12 genes as significantly upregulated and 30 genes as downregulated in the high-risk group (**Supplementary Fig. S6A**). *BCL2* was the most differentially expressed gene, significantly upregulated in patients in the high-risk groups (*MYD88/CD79* and *BCL2/EZH2* clusters). Among the most downregulated genes in the high-risk group, several encode different isoforms of collagen proteins (*COL1A1*, *COL3A1*, *COL5A1*, *COL11A1*) and proteins that remodel the extracellular matrix (*FAP*, *MMP1*, *MMP2*,

MXRA5), which are characteristic of the stromal-1 signature of DLBCL.<sup>3</sup> The stromal-1 signature is enriched with genes expressed in normal mesenchymal tissues and in CD14+ blood monocytes.<sup>3</sup> Indeed, fast gene-set enrichment analysis (fgSEA) using lymphoma-specific pathways<sup>4</sup> showed that several stromal-1-, mesenchymal-, monocyte-, and COO-related signatures were significantly enriched in the genes downregulated in high-risk compared with low-risk patients (**Supplementary Fig. S6B**). Similar gene sets were found to be enriched using the Molecular Signature Database Hallmark, C2, and C7 datasets in the fgSEA analysis (**Supplementary Fig. S6C and S6D**).

**Supplementary Table S1. Baseline disease characteristics of patients in the BEP and ITT study populations in GOYA and CAVALLI**

|                                  | GOYA           |               | CAVALLI       |              |
|----------------------------------|----------------|---------------|---------------|--------------|
|                                  | ITT (n = 1418) | BEP (n = 423) | ITT (n = 267) | BEP (n = 86) |
| <b>Median age (range), years</b> | 62 (18–86)     | 64 (18–86)    | 64 (18–85)    | 64 (27–77)   |
| <b>Male, n (%)</b>               | 752 (53.0)     | 213 (50.4)    | 146 (54.7)    | 49 (57.0)    |
| <b>ECOG PS, n (%)</b>            | n = 1417       | n = 422       | n = 266       | n = 86       |
| 0–1                              | 1231 (86.9)    | 372 (88.2)    | 229 (86.1)    | 77 (89.5)    |
| 2–3                              | 186 (13.1)     | 50 (11.9)     | –             | –            |
| ≥2                               | –              | –             | 37 (13.9)     | 9 (10.5)     |
| <b>IPI, n (%)</b>                | n = 1418       | n = 423       | n = 215       | n = 62       |
| Low                              | 283 (20.0)     | 89 (21.0)     | 3 (1.4)       | 1 (1.6)      |
| Low-int                          | 502 (35.4)     | 147 (34.8)    | 87 (40.5)     | 26 (41.9)    |
| High-int                         | 413 (29.1)     | 116 (27.4)    | 72 (33.5)     | 18 (29.0)    |
| High                             | 220 (15.5)     | 71 (16.8)     | 53 (24.7)     | 17 (27.4)    |
| <b>Elevated LDH, n (%)</b>       | n = 1413       | n = 422       | n = 265       | n = 86       |
|                                  | 816 (57.8)     | 240 (56.9)    | 149 (56.2)    | 48 (55.8)    |
| <b>Treatment, n (%)</b>          | n = 1407       | n = 421       | n = 267       | n = 86       |
| G-CHOP                           | 704 (50.0)     | 211 (50.1)    | 32 (12.0)     | 14 (16.3)    |
| R-CHOP                           | 703 (50.0)     | 210 (49.9)    | 232 (86.9)    | 72 (83.7)    |
| Not treated                      | –              | –             | 3 (1.1)       | 0 (0)        |
| <b>COO, n (%)</b>                | n = 1418       | n = 423       | n = 212       | n = 77       |
| ABC                              | 243 (17.1)     | 123 (29.1)    | 56 (26.4)     | 23 (29.8)    |
| GCB                              | 540 (38.1)     | 225 (53.2)    | 124 (58.5)    | 42 (54.6)    |

---

|              |            |           |           |           |
|--------------|------------|-----------|-----------|-----------|
| Unclassified | 150 (10.6) | 62 (14.7) | 32 (15.1) | 22 (15.6) |
|--------------|------------|-----------|-----------|-----------|

---

ABC, activated B-cell-like; BEP, biomarker-evaluable population; COO, cell-of-origin; ECOG PS, Eastern Cooperative Oncology Group performance status; G-CHOP, obinutuzumab plus cyclophosphamide, doxorubicin, vincristine and prednisone; GCB, germinal center B-cell-like; int, intermediate; IPI, International Prognostic Index; ITT, intent-to-treat; LDH, lactate dehydrogenase; R-CHOP, rituximab plus cyclophosphamide, doxorubicin, vincristine and prednisone.

**Supplementary Table S2. Confusion matrix for Random Forest training model**

|                            | Predicted, n      |                         |                       |                            | Class error |
|----------------------------|-------------------|-------------------------|-----------------------|----------------------------|-------------|
|                            | No mutations (C0) | <i>MYD88/CD79B</i> (C5) | <i>BCL2/EZH2</i> (C3) | <i>NOTCH2/TNAIFP3</i> (C1) |             |
| <b>Observed, n</b>         |                   |                         |                       |                            |             |
| No mutations (C0)          | 26                | 0                       | 0                     | 0                          | 0           |
| <i>MYD88/CD79B</i> (C5)    | 0                 | 118                     | 8                     | 4                          | 0.0923      |
| <i>BCL2/EZH2</i> (C3)      | 3                 | 2                       | 133                   | 3                          | 0.0567      |
| <i>NOTCH2/TNAIFP3</i> (C1) | 1                 | 16                      | 14                    | 95                         | 0.2460      |



**Supplementary Table S3A.** CAVALLI ethics committees (EC) and/or institutional review boards (IRB) of participating centers.

| <b>CAVALLI Study: Site Name</b>                            | <b>Site Country</b> | <b>IRB/EC Name</b>                                 |
|------------------------------------------------------------|---------------------|----------------------------------------------------|
| Fakultni nemocnice Hradec Kralove                          | Czech Republic      | Eticka komise Fakultni                             |
| Hospital Universitario La Paz                              | Spain               | CEIC Hospital Universitario                        |
| CHU Montpellier - Hopital Saint Eloi                       | France              | Comité de Protection des Personnes                 |
| University of Rochester                                    | United States       | WIRB                                               |
| VU Medisch Centrum                                         | Netherlands         | VU Medisch Centrum                                 |
| The West Clinic                                            | United States       | WIRB                                               |
| Cross Cancer Institute                                     | Canada              | Alberta Cancer Research Ethics Board               |
| Azienda Ospedaliero Universitaria San Martino              | Italy               | Comitato Etico Regionale della                     |
| Jonsson Comprehensive Cancer Center                        | United States       | UCLA Medical Center IRB                            |
| Semmelweis Egyetem                                         | Hungary             | Országos Gyógyszerészeti és Élelmezés-egészségügyi |
| TRIO - Central Coast Medical Oncology Corporation          | United States       | WIRB                                               |
| BC Cancer Agency Center for the Southern Interior          | Canada              | UBC BCCA REB                                       |
| CHU de Nancy - Hôpital de Brabois Adultes                  | France              | Comité de Protection des Personnes                 |
| Tennessee Oncology                                         | United States       | WIRB                                               |
| Concord Repatriation General Hospital                      | Australia           | Sydney Local Health Network                        |
| ICO l'Hospitalet – Hospital Duran i Reynals                | Spain               | CEIC Hospital Universitario                        |
| Hackensack University Medical Center PARTNER               | United States       | WIRB                                               |
| LKH - Universitätsklinikum der PMU Salzburg                | Austria             | Ethikkommission der PMU                            |
| Hôpital Henri Mondor                                       | France              | Comité de Protection des Personnes                 |
| Fakultni nemocnice Ostrava                                 | Czech Republic      | Eticka komise Fakultni                             |
| Debreceni Egyetem                                          | Hungary             | Országos Gyógyszerészeti és Élelmezés-egészségügyi |
| AKH - Medizinische Universität Wien                        | Austria             | Ethikkommission der Medizinischen Universität Wien |
| SMBD Jewish General Hospital d/b/a Jewish General Hospital | Canada              | Jewish General Hospital                            |
| TRIO - St. Jude Heritage Healthcare                        | United States       | WIRB                                               |
| CHU Rennes - Hopital Pontchaillou                          | France              | Comité de Protection des Personnes                 |

|                                                           |                |                                                           |
|-----------------------------------------------------------|----------------|-----------------------------------------------------------|
| CHU de Quebec - Hôpital de l' Enfant Jésus                | Canada         | CHA-Hopital Enfant Jesus-Comite d'éthique de la           |
| Clinique Victor Hugo - Centre Jean Bernard                | France         | Comité de Protection des Personnes                        |
| CHU Nantes - Hôtel Dieu                                   | France         | Comité de Protection des Personnes                        |
| Hospital Universitario Ramon y Cajal                      | Spain          | CEIC Hospital Universitario Ramon y Cajal                 |
| Erasmus Medisch Centrum                                   | Netherlands    | VU Medisch Centrum                                        |
| Centre Hospitalier Départemental Les Oudairies            | France         | Comité de Protection des Personnes                        |
| Hospital Universitari Vall d'Hebron                       | Spain          | CEIC Hospital Universitario                               |
| Princess Alexandra Hospital                               | Australia      | Metro South Health Service                                |
| Hospital Universitario de Salamanca                       | Spain          | CEIC Hospital Universitario                               |
| Peter MacCallum Cancer Centre-East Melbourne              | Australia      | Peter MacCallum Cancer Centre Research Ethics             |
| Royal Melbourne Hospital                                  | Australia      | Melbourne Health Human Research Ethics Committee          |
| Fakultni nemocnice Brno                                   | Czech Republic | Eticka komise Fakultni fakulní nemocnice                  |
| UMC Utrecht                                               | Netherlands    | VU Medisch Centrum                                        |
| Hopital Claude Huriez - CHRU Lille                        | France         | Comité de Protection des Personnes                        |
| San Juan Oncology Associates                              | United States  | Copernicus Group IRB                                      |
| Azienda Ospedaliera Vincenzo Cervello                     | Italy          | Comitato Etico Regionale della                            |
| Azienda Ospedaliero Universitaria Pisana                  | Italy          | Comitato Etico Area Vasta Nord                            |
| Istituto Nazionale Tumori Fondazione G. Pascale           | Italy          | Comitato Etico Regionale della                            |
| Országos Onkologiai Intezet                               | Hungary        | Országos Gyogyszereszteti es Élelmezés-egészségügyi       |
| Hospital del Mar                                          | Spain          | CEIC Hospital Universitario                               |
| Centre Hospitalier Lyon Sud                               | France         | Comité de Protection des Personnes                        |
| BC Cancer Agency Vancouver Centre                         | Canada         | UBC BCCA REB                                              |
| Hôpital Saint-Louis                                       | France         | Comité de Protection des Personnes                        |
| Centre Henri Becquerel                                    | France         | Comité de Protection des Personnes                        |
| Vseobecna fakultni nemocnice v Praze                      | Czech Republic | Eticka komise Vseobecne                                   |
| Azienda Ospedaliera Città della Salute e della Scienza di | Italy          | Azienda Ospedaliera Città della Salute e della Scienza di |
| Memorial Sloan Kettering Cancer Center                    | United States  | Memorial Sloan-Kettering                                  |

**Supplementary Table S3B. GOYA ethics committees (EC) and/or institutional review boards (IRB) of participating centers**

| <b>Site #</b> | <b>Investigator</b>      | <b>EC/IRB Name and Address</b>                                                                                                                                                | <b>IRB/EC Approval</b> |
|---------------|--------------------------|-------------------------------------------------------------------------------------------------------------------------------------------------------------------------------|------------------------|
| 208081        | Viola, Luciana           | Comitê de Ética em Pesquisa da PUCRS, Avenida Ipiranga, 6690 – 3º andar – Sala 314, 90610-000, Porto Alegre, RS, BRAZIL                                                       | 06-Dec-2013            |
| 208254        | Willenbacher, Ella       | Ethikkommission der Medizinischen Fakultät der Universität Wien und des AKH der Stadt Wien, Borschkegasse 8b/E 06, 1090, Wien, AUSTRIA                                        | 15-Feb-2013            |
| 208711        | Jorgensen, Judith        | De Videnskabsetiske Komitéer for Region Hovedstade, Kongens Vænge 2, 3400, Hillerød, DENMARK                                                                                  | 30-Apr-2013            |
| 208815        | Brown, Peter             | De Videnskabsetiske Komitéer for Region Hovedstade, Kongens Vænge 2, 3400, Hillerød, DENMARK                                                                                  | 30-Apr-2013            |
| 208827        | Bjørn Poulsen, Christian | De Videnskabsetiske Komitéer for Region Hovedstade, Kongens Vænge 2, 3400, Hillerød, DENMARK                                                                                  | 30-Apr-2013            |
| 208970        | JAEGER, ULRICH G.        | Ethikkommission der Medizinischen Fakultät der Universität Wien und des AKH der Stadt Wien, Borschkegasse 8b/E 06, 1090, Wien, AUSTRIA                                        | 15-Feb-2013            |
| 208979        | Suh, Jason               | Western Institutional Review Board WIRB Panel 7, 1019 39th Ave S.E., Puyallup, WA, 98374, UNITED STATES                                                                       | 19-Jul-2011            |
| 208981        | Chaves, Jorge Mario      | Western Institutional Review Board WIRB Panel 7, 1019 39th Ave S.E., Puyallup, WA, 98374, UNITED STATES                                                                       | 10-May-2011            |
| 208984        | Lerner, Rachel           | Park Nicollett Institute IRB, 3800 PARK NICOLLETT BLVD, ST. LOUIS PARK, MN, 55416, UNITED STATES                                                                              | 17-Aug-2011            |
| 208988        | Liu, Herman Sung-Yu      | Ethics Committee, Hong Kong East Cluster, 3 Lok Man Road, Chai Wan, HONG KONG                                                                                                 | 09-Jan-2013            |
| 208989        | Kwong, Yok-Lam           | HKU/HA HKW IRB, Room 901, Administration Block, 102 Pok Fu Lam Road, Queen Mary Hospital, Hong Kong, HONG KONG                                                                | 09-Nov-2012            |
| 209499        | CHUNCHARUNEE, SUPORN     | Ethical Clearance Committee on Human Rights, 270 RamaVI Road. Faculty of Medicine, Ramathibodi Hospital, Phayathai Rajathevi Bangkok 10400, 10400, Bangkok, THAILAND          | 13-Jul-2011            |
| 209500        | SIRITANARATKUL, NOPPADOL | Ethics Committee, Faculty of Medicine, Siriraj Hospital, Mahidol University, 10700, Bangkok, THAILAND                                                                         | 30-May-2011            |
| 209517        | Bunworasate, Udomsak     | Institutional Review Board, Faculty of Medicine, 3rd floor, Ananda Mahidol Building,, 10330, Patumwan, Bangkok, THAILAND                                                      | 06-Jul-2011            |
| 209518        | CHANSUNG, KANCHANA       | The Khon Kaen University Ethics Committee in human research, 123 Mitraphap Road, Dean Office 6Th Floor, Faculty Of Medicine, Khon Kaen University, 40002, Khon Kaen, THAILAND | 13-Jul-2011            |
| 209519        | ARPORNWIRAT, WICHIT      | Ethics Committee, National Cancer Institute, 268/1 Rama VI Road,, Rajathevee,, 10400, Bangkok, THAILAND                                                                       | 23-May-2011            |

| <b>Site #</b> | <b>Investigator</b>     | <b>EC/IRB Name and Address</b>                                                                                                                                             | <b>IRB/EC Approval</b> |
|---------------|-------------------------|----------------------------------------------------------------------------------------------------------------------------------------------------------------------------|------------------------|
| 209519        | ARPORNWIRAT, WICHIT     | IHRP Ethics Committee; Dept. of Medical Science, Building 8, Floor 7, Room 702-703, Tiwanon Rd., Amphur Muang, Ministry Public Health, 11000, Nonthaburi, THAILAND         | 23-May-2011            |
| 209520        | THUNGTHONG, PRAVINWAN   | IHRP Ethics Committee; Dept. of Medical Science, Building 8, Floor 7, Room 702-703, Tiwanon Rd., Amphur Muang, Ministry Public Health, 11000, Nonthaburi, THAILAND         | 23-May-2011            |
| 209520        | THUNGTHONG, PRAVINWAN   | The Ethics Committee, Rajavithi Hospital, 2 Phythai Rd. Rajthevee, 10400, Bangkok, THAILAND                                                                                | 23-May-2011            |
| 209625        | Dyer, Martin            | Leicester Royal Infirmary; Research & Development;, Gwendolen House, Gwendolen Road, Leicester, Leicester, LE5 4QF, UNITED KINGDOM                                         | 17-Oct-2011            |
| 209632        | Theocharides, Alexandre | Kantonale Ethikkommission Zürich (KEK), Kantonale Ethikkommission, Stampfenbachstrasse 121, 8090, Zürich, SWITZERLAND                                                      | 29-Jun-2011            |
| 209638        | Mamot, Christoph        | Ethikkommission Nordwest- und Zentralschweiz (EKNZ), Hebelstrasse 53, 4056, Basel, SWITZERLAND                                                                             | 28-Jun-2011            |
| 209639        | Mey, Ulrich             | Kantonale Ethikkommission Zürich (KEK), Kantonale Ethikkommission, Stampfenbachstrasse 121, 8090, Zürich, SWITZERLAND                                                      | 29-Jun-2011            |
| 209640        | ZUCCA, EMANUELE         | Comitato Etico Cantonale, Via Orico 5, 6501, Bellinzona, SWITZERLAND                                                                                                       | 21-Apr-2011            |
| 209663        | Culligan, Dominic       | Aberdeen R&D Office; R&D Office, Foresterhill House Annexe, Ashgrove West, Foresterhill, Aberdeen, AB25 2ZB, UNITED KINGDOM                                                | 04-Oct-2011            |
| 209667        | Basu, Supratik          | Wolverhampton Local Research Ethics Committee, Wolverhampton City PCT, Coniston House, Chapel Ash, Wolverhampton, WV3 0XE, UNITED KINGDOM                                  | 17-Oct-2011            |
| 209728        | GREIL, RICHARD          | Ethikkommission der Medizinischen Fakultät der Universität Wien und des AKH der Stadt Wien, Borschkegasse 8b/E 06, 1090, Wien, AUSTRIA                                     | 15-Feb-2013            |
| 209920        | RUFF, PAUL              | University of the Witwatersrand Research EC, 8 Blackwood Avenue, Parktown 2193, Postnet Suite 189, Private Bag x2600, Houghton, 2041, Johannesburg, SOUTH AFRICA           | 26-Apr-2013            |
| 209948        | Follows, George         | Addenbrookes Hospital; R&D Department, Block S4, Box 277, Hills Road, Cambridge, CB2 0QQ, UNITED KINGDOM                                                                   | 02-Aug-2011            |
| 209949        | Paneesha, Shankara      | HeartofEngland NHS Foundation Trust; Research and Development Directorate, MIDRU, Birmingham Heartlands Hospital, Brodesley Green East, Birmingham, B9 5SS, UNITED KINGDOM | 13-Oct-2011            |
| 209977        | Quiel, Dimas            | Comité Nacional de Bioética Inst.Conmem. Gorgas, Avenida Justo Arosamena y Calle 35, Inst. Conmemorativo Gorgas de Estudio de la Salud, 0816-02593, Panama, PANAMA         | 21-Jan-2014            |

| <b>Site #</b> | <b>Investigator</b>      | <b>EC/IRB Name and Address</b>                                                                                                                 | <b>IRB/EC Approval</b> |
|---------------|--------------------------|------------------------------------------------------------------------------------------------------------------------------------------------|------------------------|
| 210038        | Gironella Mesa, Mercedes | CEIC Hospital Vall D'Hebron, PASSEIG DE LA VALL D'HEBRON S/N 119-129, 08035, BARCELONA, BARCELONA, SPAIN                                       | 08-Apr-2011            |
| 210039        | De La Cruz Merino, Luis  | CEIC Hospital Vall D'Hebron, PASSEIG DE LA VALL D'HEBRON S/N 119-129, 08035, BARCELONA, BARCELONA, SPAIN                                       | 08-Apr-2011            |
| 210039        | De La Cruz Merino, Luis  | CEIC Virgen Macarena, Avenue Dr. Fedriani, 3 - Investigation Department 2nd Floor, 41009, Sevilla, SEVILLA, SPAIN                              | 08-Apr-2011            |
| 210040        | Alvarez, Ruth            | CEIC Hospital Vall D'Hebron, PASSEIG DE LA VALL D'HEBRON S/N 119-129, 08035, BARCELONA, BARCELONA, SPAIN                                       | 09-Nov-2012            |
| 210040        | Alvarez, Ruth            | Comité Ético de Investigación Clínica, Hospital Virgen de la Salud, Avda Barber 30, 45004, Toledo, TOLEDO, SPAIN                               | 09-Nov-2012            |
| 210041        | Lopez Jimenez, Javier    | CEIC Hospital Vall D'Hebron, PASSEIG DE LA VALL D'HEBRON S/N 119-129, 08035, BARCELONA, BARCELONA, SPAIN                                       | 08-Apr-2011            |
| 210041        | Lopez Jimenez, Javier    | Comite Ético de Investigación Clínica Agencia de Ensayos-HOSPITAL RAMÓN Y CAJAL, CTRA. DE COLMENAR VIEJO, KM 9,1, 28034, MADRID, MADRID, SPAIN | 08-Apr-2011            |
| 210045        | Gonzalez Barca, Eva      | CEIC Hospital de Bellvitge, C/ FEIXA LLARGA, S/N 08907, HOSPITALET DE LLOBREGAT, 08907, BARCELONA, BARCELONA, SPAIN                            | 08-Apr-2011            |
| 210045        | Gonzalez Barca, Eva      | CEIC Hospital Vall D'Hebron, PASSEIG DE LA VALL D'HEBRON S/N 119-129, 08035, BARCELONA, BARCELONA, SPAIN                                       | 08-Apr-2011            |
| 210046        | Salar Silvestre, Antonio | CEIC Hospital Vall D'Hebron, PASSEIG DE LA VALL D'HEBRON S/N 119-129, 08035, BARCELONA, BARCELONA, SPAIN                                       | 08-Apr-2011            |
| 210046        | Salar Silvestre, Antonio | CEIC Parc de Salut Mar; IMIM- Hospital del Mar, C/ Dr. Aiguader, 88, Planta 1, 08003, Barcelona, BARCELONA, SPAIN                              | 08-Apr-2011            |
| 210047        | Gofñi, Mª Angeles        | CEIC de Navarra; Departamento de Salud. Pabellón de Docencia., C/ Irunlarrea, 3, 31008, Pamplona, NAVARRA, SPAIN                               | 08-Apr-2011            |
| 210047        | Gofñi, Mª Angeles        | CEIC Hospital Vall D'Hebron, PASSEIG DE LA VALL D'HEBRON S/N 119-129, 08035, BARCELONA, BARCELONA, SPAIN                                       | 08-Apr-2011            |
| 210048        | Gine Soca, Eva           | CEIC H Clinic i provincial de Barcelona, C/ Villarroel, 170, 8036, Barcelona, BARCELONA, SPAIN                                                 | 08-Apr-2011            |
| 210048        | Gine Soca, Eva           | CEIC Hospital Vall D'Hebron, PASSEIG DE LA VALL D'HEBRON S/N 119-129, 08035, BARCELONA, BARCELONA, SPAIN                                       | 08-Apr-2011            |

| <b>Site #</b> | <b>Investigator</b>   | <b>EC/IRB Name and Address</b>                                                                                                                                                                                | <b>IRB/EC Approval</b> |
|---------------|-----------------------|---------------------------------------------------------------------------------------------------------------------------------------------------------------------------------------------------------------|------------------------|
| 210095        | CANNELL, PAUL         | Royal Perth Hospital Ethics Committee, Level 3, Colonial House, Royal Perth Hospital, Wellington Street, 6000, Perth, Western Australia, AUSTRALIA                                                            | 24-Aug-2011            |
| 210096        | CATALANO, JOHN        | Peninsula Health Research & Ethics Committee, Frankston Hospital, PO Box 52, 3199, Frankston, Victoria, AUSTRALIA                                                                                             | 27-Sep-2011            |
| 210097        | Opat, Stephen         | Southern Health Human Research Ethics Committee, 246 CLAYTON ROAD, 3168, CLAYTON, Victoria, AUSTRALIA                                                                                                         | 21-Jun-2011            |
| 210189        | VRANOVSKY, ANDREJ     | Etická komisia, Národný onkologický ústav, KLENOVA 1, BRATISLAVA, 833 10, BRATISLAVA, SLOVAKIA                                                                                                                | 15-Jun-2011            |
| 210198        | TRNENY, MAREK         | Eticka Komise Vseobecne fakultni nemocnice, Na Bojisti 1, 128 08, Praha 2, CZECH REPUBLIC                                                                                                                     | 14-Jul-2011            |
| 210199        | MAYER, JIRI           | Fakultni nemocnice Brno; Eticka komise, Jihlavska 20, 625 00, Brno, CZECH REPUBLIC                                                                                                                            | 14-Jul-2011            |
| 210200        | BELADA, DAVID         | Fakultni nemocnice Hradec Kralove; Eticka komise, Sokolska 581, 500 05, Hradec Kralove, CZECH REPUBLIC                                                                                                        | 14-Jul-2011            |
| 210326        | SCHNELL, FREDERICK M. | Western Institutional Review Board WIRB Panel 7, 1019 39th Ave S.E., Puyallup, WA, 98374, UNITED STATES                                                                                                       | 30-Aug-2011            |
| 210417        | ROSTA, ANDRAS         | Medical Research Council, Ethics Committee for Clinical Pharmacology, Arany J. u. 6-8., 1051, Budapest, HUNGARY                                                                                               | 05-Sep-2011            |
| 210418        | Mikala, Gabor         | Medical Research Council, Ethics Committee for Clinical Pharmacology, Arany J. u. 6-8., 1051, Budapest, HUNGARY                                                                                               | 05-Sep-2011            |
| 210419        | ILLES, ARPAD          | Medical Research Council, Ethics Committee for Clinical Pharmacology, Arany J. u. 6-8., 1051, Budapest, HUNGARY                                                                                               | 05-Sep-2011            |
| 210420        | EGYED, MIKLOS         | Medical Research Council, Ethics Committee for Clinical Pharmacology, Arany J. u. 6-8., 1051, Budapest, HUNGARY                                                                                               | 05-Sep-2011            |
| 210421        | DEMETER, JUDIT        | Medical Research Council, Ethics Committee for Clinical Pharmacology, Arany J. u. 6-8., 1051, Budapest, HUNGARY                                                                                               | 05-Sep-2011            |
| 210447        | Wrobel, Tomasz        | Komisja Bioetyki Uniwersytetu Medycznego w Lodzi, ul. Zeligowskiego 7/9, 90-752, Lodz, POLAND                                                                                                                 | 12-Mar-2013            |
| 210448        | HELLMANN, ANDRZEJ     | Komisja Bioetyki Uniwersytetu Medycznego w Lodzi, ul. Zeligowskiego 7/9, 90-752, Lodz, POLAND                                                                                                                 | 12-Mar-2013            |
| 210449        | Pluta, Andrzej        | Komisja Bioetyki Uniwersytetu Medycznego w Lodzi, ul. Zeligowskiego 7/9, 90-752, Lodz, POLAND                                                                                                                 | 13-Mar-2013            |
| 210504        | Gomez Almaguer, David | Comite de Etica y Comité de Investigacion de la Fac de Med de la UANL y HospUniv Dr. Jose E Gonzalez, Francisco Ignacio Madero y av. Gonzalitos, s/n col. mitras centro, 64460, Monterrey, NUEVO LEON, MEXICO | 13-Feb-2013            |

| <b>Site #</b> | <b>Investigator</b>        | <b>EC/IRB Name and Address</b>                                                                                                                                  | <b>IRB/EC Approval</b> |
|---------------|----------------------------|-----------------------------------------------------------------------------------------------------------------------------------------------------------------|------------------------|
| 210600        | Flinn, Ian                 | Western Institutional Review Board WIRB Panel 7, 1019 39th Ave S.E., Puyallup, WA, 98374, UNITED STATES                                                         | 10-Dec-2012            |
| 210601        | Arrowsmith, Edward         | Western Institutional Review Board WIRB Panel 7, 1019 39th Ave S.E., Puyallup, WA, 98374, UNITED STATES                                                         | 02-Aug-2011            |
| 210612        | Zalio, Francesco           | COMITATO ETICO INTERAZIENDALE AZIENDA OSPEDALIERA DI ALESSANDRIA SS ANTONIO E BIAGIO E CESARE ARRIGO, VIA VENEZIA, 16, 15100, ALESSANDRIA, Piemonte, ITALY      | 17-Apr-2013            |
| 210613        | Specchia, Giorgina         | IEC Azienda Policlinico Consorziale di Bari, P.zza Giulio Cesare, 11, 70124, Bari, Puglia, ITALY                                                                | 31-Jul-2013            |
| 210614        | ROSSI, GIUSEPPE            | Comitato Etico della Provincia di Brescia, P.zza Spedali Civili, 1, 25123, Brescia, Lombardia, ITALY                                                            | 07-Jun-2011            |
| 210615        | DI RAIMONDO, FRANCESCO     | COMITATO ETICO CATANIA 1, VIA S. SOFIA 78, 95123, CATANIA, Sicilia, ITALY                                                                                       | 30-May-2011            |
| 210616        | Congiu, Angela<br>Giovanna | Comitato Etico Regione Liguria (Sezione 2), LARGO ROSANNA BENZI 10, 16132, GENOVA, Liguria, ITALY                                                               | 23-Jun-2011            |
| 210617        | Vanazzi, Anna              | Comitato Etico Degli IRCCS Istituto Europeo di Oncologia e Centro Cardiologico Monzino, VIA RIPAMONTI 435, 20141, MILANO, Lombardia, ITALY                      | 27-Jul-2011            |
| 210620        | Califano, Catello          | Comitato Etico Campania Sud, Piazza San Giovanni, 80031, Bruscianno, Campania, ITALY                                                                            | 21-May-2013            |
| 210621        | GAIDANO,<br>GIANLUCA       | A.O.U. Maggiore della Carità                                                                                                                                    | 13-May-2011            |
| 210622        | PETRINI, MARIO             | Comitato Etico Regione Toscana - Area Vasta Nord Ovest, Via Roma 67, c/o Presidio Ospedaliero, 56126, Pisa, Toscana, ITALY                                      | 26-May-2011            |
| 210624        | MERLI,<br>FRANCESCO        | Comitato Etico Provinciale Di Reggio Emilia, V.le Risorgimento 57, c/o Direzione Sanitaria, 42100, Reggio Emilia, Emilia-Romagna, ITALY                         | 20-Jun-2011            |
| 210625        | MARTELLI,<br>MAURIZIO      | CE DELL'UNIVERSITA' "SAPIENZA" - POLICLINICO UNIVERSITARIO UMBERTO I - AZIENDA OSPEDALIERA S.ANDREA, Viale Policlinico, 155, 00161, Roma, Lazio, ITALY          | 21-Jul-2011            |
| 210626        | Cascavilla, Nicola         | COMITATO ETICO DELL'IRCCS GIOVANNI PAOLO II DI BARI PRESSO IRCCS CASA SOLLIEVO DELLA SOFFERENZA, V. le Cappuccini 1, 71013, San Giovanni Rotondo, Puglia, ITALY | 06-Sep-2011            |
| 210627        | LIBERATI, ANNA<br>MARINA   | Comitato Etico delle Aziende Sanitarie dell'Umbria, Via Della Rivoluzione, 16, 06073, Ellera Di Corciano, Umbria, ITALY                                         | 21-Mar-2013            |
| 210628        | GHERLINZONI,<br>FILIPPO    | Comitato Etico Per la Sperimentazione Clinica (CESC) della Provincia di Treviso e Belluno, Via Sant'Ambrogio di Fiera 37, 31100, Treviso, Veneto, ITALY         | 27-May-2013            |

| <b>Site #</b> | <b>Investigator</b> | <b>EC/IRB Name and Address</b>                                                                                                                                                      | <b>IRB/EC Approval</b> |
|---------------|---------------------|-------------------------------------------------------------------------------------------------------------------------------------------------------------------------------------|------------------------|
| 210629        | ZAJA, FRANCESCO     | Comitato Etico Unico Regionale, Via Pozzuolo,, 330, 33100, Udine, Friuli-Venezia Giulia, ITALY                                                                                      | 20-Sep-2011            |
| 210630        | KRAMPERA, MAURO     | CEC DELLE PROVINCE DI VERONA E ROVIGO, Piazzale A. Stefani, 1, 37126, Verona, Veneto, ITALY                                                                                         | 31-Aug-2011            |
| 210631        | Cavallo, Federica   | A.O. Città della salute e della scienza di Torino; Comitato Etico, Corso Bramante 88/90, 10126, Torino, Piemonte, ITALY                                                             | 13-Jun-2011            |
| 210632        | BOSI, ALBERTO       | COMITATO ETICO AREA VASTA CENTRO, Largo Brambilla 3, 50139, Firenze, Toscana, ITALY                                                                                                 | 13-Jun-2011            |
| 210634        | VITOLO, UMBERTO     | A.O. Città della salute e della scienza di Torino; Comitato Etico, Corso Bramante 88/90, 10126, Torino, Piemonte, ITALY                                                             | 13-Jun-2011            |
| 230727        | Freilone, Roberto   | COMITATO ETICO A.O.U. SAN LUIGI GONZAGA DI ORBASSANO, Via Regione Gonzole, 10, 10043, Orbassano, Piemonte, ITALY                                                                    | 12-Jun-2013            |
| 230743        | Lunin, Scott        | Western Institutional Review Board WIRB Panel 7, 1019 39th Ave S.E., Puyallup, WA, 98374, UNITED STATES                                                                             | 11-Jul-2013            |
| 230745        | Chen, Franklin      | Western Institutional Review Board WIRB Panel 7, 1019 39th Ave S.E., Puyallup, WA, 98374, UNITED STATES                                                                             | 12-Jul-2011            |
| 230747        | Kudrik, Fred J.     | Western Institutional Review Board WIRB Panel 7, 1019 39th Ave S.E., Puyallup, WA, 98374, UNITED STATES                                                                             | 25-Jul-2011            |
| 230750        | Prager, Diane       | Western Institutional Review Board WIRB Panel 7, 1019 39th Ave S.E., Puyallup, WA, 98374, UNITED STATES                                                                             | 17-May-2011            |
| 230780        | Oliveira, Jose      | Comitê de Ética em Pesquisa da Casa de Saúde Santa Marcelina, Rua Santa Marcelina, 177, Itaquera, 08270-070, São Paulo, SP, BRAZIL                                                  | 26-Feb-2014            |
| 230789        | Chua, Neil          | HREBA - Health Research Ethics Board of Alberta - Cancer Committee, c/o Alberta Innovates - Health Solutions, Suite 1500 - 10104, 103 Avenue NW, T5J 0H8, EDMONTON, Alberta, CANADA | 29-Jun-2011            |
| 230790        | McFarlane, Joshua   | Western Institutional Review Board WIRB Panel 7, 1019 39th Ave S.E., Puyallup, WA, 98374, UNITED STATES                                                                             | 28-Jul-2011            |
| 230792        | STEWART, DOUGLAS    | HREBA - Health Research Ethics Board of Alberta - Cancer Committee, c/o Alberta Innovates - Health Solutions, Suite 1500 - 10104, 103 Avenue NW, T5J 0H8, EDMONTON, Alberta, CANADA | 25-Jul-2011            |
| 230919        | ZINZANI, Pier Luigi | Comitato Etico Indipendente dell'Azienda Ospedaliero-Universitaria di Bologna, Viale Albertoni, 15, 40138, Bologna, Emilia-Romagna, ITALY                                           | 07-Jun-2011            |
| 230920        | Stelitano, Caterina | Comitato Etico Regionale - Sezione Area Sud, Via Spirito Santo, 24, 89128, Reggio Calabria, Calabria, ITALY                                                                         | 14-Jun-2011            |
| 230921        | PINTO, ANTONIO      | Comitato Etico IRCCS Pascale, VIA M. SEMMOLA 1, 80131, NAPOLI, Campania, ITALY                                                                                                      | 20-Jun-2011            |



| <b>Site #</b> | <b>Investigator</b>         | <b>EC/IRB Name and Address</b>                                                                                                                                                        | <b>IRB/EC Approval</b> |
|---------------|-----------------------------|---------------------------------------------------------------------------------------------------------------------------------------------------------------------------------------|------------------------|
| 230922        | Rege Cambrin, Giovanna      | COMITATO ETICO A.O.U. SAN LUIGI GONZAGA DI ORBASSANO, Via Regione Gonzole, 10, 10043, Orbassano, Piemonte, ITALY                                                                      | 03-May-2013            |
| 230923        | Ferreri, Andres             | Comitato Etico Irccs Ospedale San Raffaele, VIA OLGETTINA 60, 20132, MILANO, Lombardia, ITALY                                                                                         | 14-Jul-2011            |
| 231027        | KIM, WONSEOG                | Samsung Medical Center Institutional Review Board, 81, Irwon-ro, Gangnam-gu, 06351, Seoul, KOREA, REPUBLIC OF                                                                         | 11-Apr-2011            |
| 231028        | Suh, Cheolwon               | Asan Medical Center Ethics Committee, 88, Olympic-ro 43-gil, Songpa-gu, 05505, Seoul, KOREA, REPUBLIC OF                                                                              | 18-Apr-2011            |
| 231030        | Kim, Jin Seok               | SeveranceHospital- YonseiUniversity; IRB, 2F, GwangHye-gwan, 50-1, Yonsei-ro, Seodaemun-gu, 03722, Seoul, KOREA, REPUBLIC OF                                                          | 15-Apr-2011            |
| 231032        | Kim, Tae Min                | Seoul National University Hospital; IRB, 101, Daehak-ro, Jongno-gu, 03080, Seoul, KOREA, REPUBLIC OF                                                                                  | 17-May-2011            |
| 231147        | Chang, Hung                 | Chang Gung Med Found, Institutional Review Board, No. 123, Dunghu Rd., Jioulu Village, Taoyuan County, 333, Gueishan Township, TAIWAN                                                 | 07-Mar-2013            |
| 231149        | HSIAO, LIANG-TSAI           | TVGH Institutional Review Board, No.201, Shih-Pai Road, Sec.2, 112, Taipei, TAIWAN                                                                                                    | 08-Feb-2013            |
| 231348        | PAVONE, VINCENZO            | Comitato Etico Area 3 - ASL Lecce, Via Miglietta, 5, 73100, LECCE, Puglia, ITALY                                                                                                      | 26-Mar-2013            |
| 231349        | Mannina, Donato             | Comitato Etico Interaziendale della Provincia di Messina, via Consolare Valeria, 98125, Messina, Sicilia, ITALY                                                                       | 25-Mar-2013            |
| 231350        | CORRADINI, PAOLO            | Comitato Etico Indipendente della Fondazione IRCCS Istituto Nazionale dei Tumori di Milano, Via Giacomo Veneziani 1, 20133, Milano, Lombardia, ITALY                                  | 30-Jun-2011            |
| 231351        | Arcaini, Luca               | Comitato Etico Referente per l'Area di Pavia, VIALE GOLGI 19, 27100, PAVIA, Lombardia, ITALY                                                                                          | 06-Jun-2011            |
| 231509        | Zaragoza Vazquez, Alva Nora | Comite de etica en investigacion CECAN Chihuahua; Comite de etica en investigacion CECAN Chihuahua, Ejército Mexicano No. 3700, Col. Centro, C.P.31000., Chihuahua, CHIHUAHUA, MEXICO | 20-Nov-2012            |
| 231800        | CRUMP, MICHAEL              | University Health Network Research Ethics Board, 700 University Avenue, 8th Floor, Room 8-19, M5G1Z5, Toronto, Ontario, CANADA                                                        | 01-Feb-2012            |
| 231802        | Johnson, Nathalie           | McGill University; McGill University; Ethics Board, 3655 Promenade Sir William Osler - 6th Floor, H3G 1Y6, Montreal, Quebec, CANADA                                                   | 09-Sep-2011            |
| 231805        | SEHN, LAURIE                | UBC BCCA Research Ethics Board (BCCA REB), 600 - 750 West Broadway, Fairmont Medical Building, Room 652, V5Z 1H5, Vancouver, British Columbia, CANADA                                 | 20-Feb-2012            |

| <b>Site #</b> | <b>Investigator</b>         | <b>EC/IRB Name and Address</b>                                                                                                                                          | <b>IRB/EC Approval</b> |
|---------------|-----------------------------|-------------------------------------------------------------------------------------------------------------------------------------------------------------------------|------------------------|
| 231806        | Keating, Mary-Margaret      | Nova Scotia Health Authority Research Ethics Board, QEII Health Science Centre for Clinical Res, Room 118-5790 University Avenue, B3H 1V7, Halifax, Nova Scotia, CANADA | 12-Mar-2012            |
| 231810        | Larouche, Jean-Francois     | Comité d'éthique de la recherche du CHU de Québec, 10 rue de L'Espinay, Suite A0-124, G1L 3L5, Québec, Quebec, CANADA                                                   | 07-Sep-2011            |
| 231855        | WRIGHT, DAVID               | Western Institutional Review Board WIRB Panel 7, 1019 39th Ave S.E., Puyallup, WA, 98374, UNITED STATES                                                                 | 27-Jun-2013            |
| 231888        | Ramirez, Carlos             | Comite De Etica En Investigacion Fundacion Universitaria Sanitas, Carrera 7 # 173 - 64, Bogota, COLOMBIA                                                                | 15-Mar-2012            |
| 231917        | Elemary, Mohamed            | University of Saskatchewan Biomedical Research Ethics Board, 117 Science Place, Room 305 Kirk Hall, S7N 5C8, Saskatoon, Saskatchewan, CANADA                            | 22-Jun-2011            |
| 232136        | Ramirez Romero, Eva Fabiola | OSMO, S.C.; Comité de ética en investigación y comité de investigación, Humboldt 302, col. centro, C.P. 68000, Oaxaca, OAXACA, MEXICO                                   | 28-Jan-2013            |
| 235676        | Terui, Yasuhito             | The Cancer Institute Hospital of JFCR Institutional Review Board, 3-8-31 Ariake Koto-Ku, 135-8550, Tokyo, JAPAN                                                         | 07-Sep-2011            |
| 235677        | Maruyama, Dai               | National Cancer Center Institutional Review Board, 5-1-1 Tsukiji Chuo-Ku, 104-0045, Tokyo, JAPAN                                                                        | 01-Nov-2011            |
| 235679        | Uchida, Toshiki             | Japanese Red Cross Nagoya Daini Hospital Institutional Review Board, 2-9 Myoken-cho Showa-Ku Nagoya-shi, 466-8650, Aichi, JAPAN                                         | 28-Sep-2011            |
| 235680        | Yamamoto, Go                | Toranomon Hospital and Toranomon Hospital Kajigaya Institutional Review Board, 2-2-2 Toranomon, Minato-ku, 105-8470, Tokyo, JAPAN                                       | 17-Oct-2011            |
| 236213        | Kanakura, Yuzuru            | Osaka University Hospital Institutional Review Board, 2-15, Yamadaoka, Suita-shi, 565-0871, Osaka, JAPAN                                                                | 11-Nov-2011            |
| 238086        | Mollica, Luigina            | Comité d'éthique de la recherche HMR, Pavillion Rachel-Touriguy, 5415 boul de L'Assomption, 4th floor, H1T 2M4, Montreal, Quebec, CANADA                                | 14-Dec-2011            |
| 238173        | BENCE-BRUCKLER, ISABELLE    | Ottawa Hospital Research Ethics Board, Civic Box 411, 726 Parkdale Avenue, K1Y 4E9, Ottawa, Ontario, CANADA                                                             | 24-Jan-2012            |
| 245517        | Kroschinsky, Frank          | EK Würzburg, Versbacher Str. 9, 97078, Würzburg, GERMANY                                                                                                                | 30-Aug-2012            |
| 245517        | Kroschinsky, Frank          | Ethik-Kommission am Universitätsklinikum Carl-Gustav-Carus Technische Universität Dresden, Fetscherstrasse 74, 01307, Dresden, GERMANY                                  | 30-Aug-2012            |
| 245519        | Witzens-Harig, Mathias      | EK Würzburg, Versbacher Str. 9, 97078, Würzburg, GERMANY                                                                                                                | 30-Aug-2012            |

| <b>Site #</b> | <b>Investigator</b>            | <b>EC/IRB Name and Address</b>                                                                                                                  | <b>IRB/EC Approval</b> |
|---------------|--------------------------------|-------------------------------------------------------------------------------------------------------------------------------------------------|------------------------|
| 245519        | Witzens-Harig, Mathias         | Ethikkommission der Medizinischen Fakultät Heidelberg, Alte Glockengießerei 11/1, 69115, Heidelberg, GERMANY                                    | 30-Aug-2012            |
| 245597        | Topp, Max                      | EK Würzburg, Versbacher Str. 9, 97078, Würzburg, GERMANY                                                                                        | 30-Aug-2012            |
| 245597        | Topp, Max                      | Ethik-Kommission der Medizinischen Fakultät der Friedrich-Alexander-Universität Erlangen-Nürnberg, Krankenhausstr. 12, 91054, Erlangen, GERMANY | 30-Aug-2012            |
| 245598        | Krause, Stefan                 | EK Würzburg, Versbacher Str. 9, 97078, Würzburg, GERMANY                                                                                        | 30-Aug-2012            |
| 245598        | Krause, Stefan                 | Ethik-Kommission der Medizinischen Fakultät der Friedrich-Alexander-Universität Erlangen-Nürnberg, Krankenhausstr. 12, 91054, Erlangen, GERMANY | 30-Aug-2012            |
| 245599        | Kurz-zur Hausen, Anna Kordelia | EK Würzburg, Versbacher Str. 9, 97078, Würzburg, GERMANY                                                                                        | 30-Aug-2012            |
| 247997        | Basso, Alfredo                 | Comite de Docencia e Investigacion del Sanatorio Parque, Boulevard Oroño 860, 2000, Rosario, ARGENTINA                                          | 09-Nov-2012            |
| 247997        | Basso, Alfredo                 | Comite Indep. De Etica Para Ensayos En Farmacolog., Pte. J. E. Uriburu 774, 1er Piso, C1027AAP, Buenos Aires, ARGENTINA                         | 09-Nov-2012            |
| 250709        | Tatsumi, Yoichi                | Kindai University Hospital Institutional Review Board, 377-2 Ohnohigashi, Osaka-Sayama-shi, 589-8511, Osaka, JAPAN                              | 11-Sep-2012            |
| 250710        | Akashi, Koichi                 | Kyushu University Hospital IRB, 3-1-1 Maidashi, Higashi-Ku, Fukuoka-Shi, 812-8582, Fukuoka, JAPAN                                               | 05-Oct-2012            |
| 250711        | Nakamae, Hirohisa              | Osaka City University Hospital IRB, 1-5-7,Asahimachi, Abeno-ku, Osaka-shi, 545-8586, Osaka, JAPAN                                               | 31-Oct-2012            |
| 251201        | Ueda, Yasunori                 | Kurashiki Central Hospital Institutional Review Board, 1-1-1 Miwa, Kurashiki-shi, 710-8602, Okayama, JAPAN                                      | 15-Oct-2012            |
| 251406        | Hamed, Aryan                   | Medical Research Council, Ethics Committee for Clinical Pharmacology, Arany J. u. 6-8., 1051, Budapest, HUNGARY                                 | 26-Sep-2012            |
| 251624        | McDonald, Andrew               | Pharma-Ethics Independent Research Ethics Committee, 123 Amcor Road, Lyttleton, 0157, Centurion, SOUTH AFRICA                                   | 22-Nov-2012            |
| 251626        | COHEN, GRAHAM                  | Pharma-Ethics Independent Research Ethics Committee, 123 Amcor Road, Lyttleton, 0157, Centurion, SOUTH AFRICA                                   | 22-Nov-2012            |
| 251628        | RAPOPORT, BERNARDO             | Pharma-Ethics Independent Research Ethics Committee, 123 Amcor Road, Lyttleton, 0157, Centurion, SOUTH AFRICA                                   | 22-Nov-2012            |
| 251630        | SAVIC, IVANKA                  | Ethics Committee Clinical Center Vojvodine, Hajduk Veljkova 1, 21000, Novi Sad, SERBIA                                                          | 10-Dec-2012            |
| 251631        | MIHALJEVIC, BILJANA            | Ethics Committee Clinical Center Of Serbia, PASTEROVA 2, 11000, BELGRADE, SERBIA                                                                | 13-Dec-2012            |

| <b>Site #</b> | <b>Investigator</b> | <b>EC/IRB Name and Address</b>                                                                                                                                              | <b>IRB/EC Approval</b> |
|---------------|---------------------|-----------------------------------------------------------------------------------------------------------------------------------------------------------------------------|------------------------|
| 251856        | ROBAK, TADEUSZ      | Komisja Bioetyki Uniwersytetu Medycznego w Lodzi, ul. Zeligowskiego 7/9, 90-752, Lodz, POLAND                                                                               | 13-Mar-2013            |
| 251857        | WALEWSKI, JAN       | Komisja Bioetyki Uniwersytetu Medycznego w Lodzi, ul. Zeligowskiego 7/9, 90-752, Lodz, POLAND                                                                               | 13-Mar-2013            |
| 252760        | Tamura, Hideto      | Nippon Medical School Hospital Institutional Review Board, 1-1-5 Sendagi, Bunkyo-ku, 113-8603, Tokyo, JAPAN                                                                 | 25-Oct-2012            |
| 252864        | Chiou, Lun-Wei      | Koo Foundation Sun Yat-Sen Cancer Center, IRB, 125 Lih-Der Road, Pei-Tou District, 112, Taipei, TAIWAN                                                                      | 10-Apr-2013            |
| 253012        | ZHU, JUN            | The Ethics Committee of Beijing Cancer Hospital, No.52 Fucheng Road,, Haidian District,, 100036, Beijing, CHINA                                                             | 02-Apr-2013            |
| 253013        | Zhang, Qingyuan     | EC of The Cancer Hospital of Harbin Medical University; Ethics Committee, Rm609, Admin building, No. 150 Ha Ping Road, 150081, Harbin, CHINA                                | 29-Jan-2013            |
| 253023        | Du, Xin             | EC of Guangdong General Hospital, 106, ZHONGSHAN ER ROAD, 510080, GUANGZHOU, CHINA                                                                                          | 09-Jun-2013            |
| 253024        | WU, GANG            | Ethics Committee of Tongji Medical College, HUST, 1095 Jie Fang Da Dao Rd., Wuhan, Hu Bei Province, 430030, Wuhan, CHINA                                                    | 28-Jan-2013            |
| 253172        | Ren, Hanyun         | The Ethics Committee of Peking University First Hospital, No.6 Dahongluochang Street, Xicheng District, 100034, Beijing, CHINA                                              | 27-Mar-2013            |
| 253174        | Li, Wei             | the First Hospital of Jilin University; The Committee of The first Hospital of Jilin University, 71 Xinmin Street, Changchun City, Jilin Province, 130021, Changchun, CHINA | 07-Feb-2013            |
| 253176        | Xiao, Xiubin        | 307 Hospital Ethics Committee, Number 8, Fengtai east street, 100071, Beijing, CHINA                                                                                        | 01-Mar-2013            |
| 253177        | SHI, YUAN KAI       | Local EC of CHINESE ACADEMY OF MEDICAL SCIENCE; CANCER INST. & HOSPITAL, Number17, Panjiayuan south road, 100021, Beijing, CHINA                                            | 01-Apr-2013            |
| 253199        | Liu, Li             | EC of Tangdu Hospital, NO. 1,Xin Si Road,Baqiao District, Xi'an City,Shannxi Province, 710038, Xi'an, CHINA                                                                 | 26-Feb-2013            |
| 253204        | Zhang, Huilai       | EC of Tianjin Cancer Hospital, Ti-Yuan-Bei, Huan-Hu-Xi Road, He X1 District, 300060, Tianjin, CHINA                                                                         | 12-Apr-2013            |
| 253213        | Hong, Xiaonan       | EC of Fudan University Shanghai Cancer Center, 5th Floor, Building 2, No.270, Dong'an Road, 200032, Shanghai, CHINA                                                         | 28-Jan-2013            |
| 253214        | Jin, Jie            | 1st Affiliated Hospital Of Zhejiang University, No.79 Qingchun Road, 310009, Hangzhou, CHINA                                                                                | 21-May-2013            |
| 253220        | Yang, Yu            | EC of Fujian Cancer Hospital, No. 91, Fuma Road, 350014, Fuzhou, CHINA                                                                                                      | 27-Mar-2013            |
| 253230        | Hu, Jianda          | EC of Fujian Medical University Union Hospital, No.29 Xinquan Road, 350001, Fuzhou, CHINA                                                                                   | 09-Apr-2013            |

| <b>Site #</b> | <b>Investigator</b>                 | <b>EC/IRB Name and Address</b>                                                                                                                                                             | <b>IRB/EC Approval</b> |
|---------------|-------------------------------------|--------------------------------------------------------------------------------------------------------------------------------------------------------------------------------------------|------------------------|
| 253231        | FENG, JIFENG                        | JiangSu Province Cancer Hospital/Ethic Committee Office, No. 42 Bai Zi Ting Road, 210009, Nanjing, CHINA                                                                                   | 30-Jan-2013            |
| 253232        | Li, Junmin                          | EC of RUIJIN HOSPITAL, No.197,The second Ruijin Road, Huangpu District,Shanghai, 200025, Shanghai, CHINA                                                                                   | 01-Apr-2013            |
| 253233        | WANG, JIANMIN                       | Shanghai Changhai Hospital, Room 212, Building 17, 174 Changhai Road, 200433, Shanghai, CHINA                                                                                              | 26-Feb-2013            |
| 253234        | WU, Depei                           | EC of First Affiliated Hospital of Soochow University, 96 SHIZI STREET, 215006, SUZHOU, CHINA                                                                                              | 19-Mar-2013            |
| 253423        | Lai, Yongrong                       | Ethics Committee of The First Hospital of Guangxi Medical University, No. 6 Shuang Yang Road, 530021, Nanning, CHINA                                                                       | 06-Feb-2013            |
| 253425        | Li, Jianyong                        | EC of Jiangsu Province People Hospital, NO 300 GUANGZHOU RD, 210029, NANJING, CHINA                                                                                                        | 28-Jan-2013            |
| 253429        | Li, Yan                             | EC of The First Hospital of China Medical University, No. 155, Nanjingbei Road, Heping District, Shenyang, 110001, Shenyang, CHINA                                                         | 27-Jun-2013            |
| 253431        | Huang, Huiqiang                     | EC of Sun Yet-sen University Cancer Center, No. 651, Dongfeng East Road, 510060, Guangzhou, CHINA                                                                                          | 30-Jan-2013            |
| 253781        | Segovia, Javier                     | Comité de Ética en Investigación Clínica, Calle 163A No 13B-60, Bogota, COLOMBIA                                                                                                           | 06-Mar-2013            |
| 253844        | Lemieux, Bernard                    | Comité d'éthique de la recherche, CHUM, Pavillion R, 900 Rue St-Denis, 3rd Floor, H2X 0A9, Montreal, Quebec, CANADA                                                                        | 18-Apr-2013            |
| 254286        | Gonzalez Lopez Elizalde, Montserrat | Comite de Investigacion CECLIQ; Comite de Investigacion CECLIQ, Prol. Privada Ignacio Zaragoza,, No. 16-B 2do piso, Col. Centro, C.P. 76000, Querétaro, Qro., Queretaro, QUERETARO, MEXICO | 09-Jan-2013            |
| 254300        | Yi, Pingyong                        | EC of Hunan Provincial Cancer Hospital, 283 Tongzipo Raod, Yuelu District, 410006, Changsha, CHINA                                                                                         | 02-Apr-2013            |
| 254304        | Hu, Yu                              | Ethics Committee of Tongji Med. Col, Huazhong Univ. of Sci. & Tech, No.1277 Jiefang Dadao, 430022, Wuhan City, CHINA                                                                       | 28-Jan-2013            |
| 254888        | Valdiviezo, Natalia                 | Comité Institucional de Ética en Investigación de la Asociación Benéfica Prisma, Carlos Gonzales #251 Urbanización Maranga San Miguel, Lima 32, Lima, PERU                                 | 04-Feb-2013            |
| 254889        | Quintana, Shirley                   | Comité Institucional de Ética en Investigación del INEN, Avenida Angamos Este 2520, Lima 11, Lima, PERU                                                                                    | 04-Mar-2013            |
| 254926        | Tumyan, Gayane                      | Blokhin Russian Cancer Research Center Ethics Committee, Kashirskoye shosse,24, Moscow, RUSSIAN FEDERATION                                                                                 | 30-Jul-2013            |
| 254933        | Chagorova, Tatiana                  | E.C. at the Penza Regional Oncology Dispensary, 37A, prospekt Stroiteley, 440071, Penza, RUSSIAN FEDERATION                                                                                | 08-Feb-2013            |

| <b>Site #</b> | <b>Investigator</b> | <b>EC/IRB Name and Address</b>                                                                                                          | <b>IRB/EC Approval</b> |
|---------------|---------------------|-----------------------------------------------------------------------------------------------------------------------------------------|------------------------|
| 254934        | Kuzmin, Alexey      | Republican Clinical Oncology Dispensary of MoH of Tatarstan, 29, Sibirskiy trakt, 420029, Kazan, RUSSIAN FEDERATION                     | 15-Mar-2013            |
| 254939        | SAMOYLOVA, OLGA     | E.C.at the Nizhny Novgorod Regional Clinical Hospital N.A. Semashko, 190, Rodionova street, 306126, Nizhny Novgorod, RUSSIAN FEDERATION | 27-Dec-2012            |
| 254942        | MYASNIKOV, ALEXANDR | E.C. of Republican Hospital Named After V.A. Baranov, Pirogova street, 3, 185019, Petrozavodsk, RUSSIAN FEDERATION                      | 25-Jan-2013            |
| 255301        | Cho, Seok Goo       | Seoul St. Mary's Hospital; IRB, 222, Banpo-daero, Seocho-gu, 06591, Seoul, KOREA, REPUBLIC OF                                           | 07-Feb-2013            |
| 255302        | Eom, Hyeon Seok     | IRB of National Cancer Center, 323, Ilsan-ro, Ilsandong-gu, Goyang-si, 10408, Gyeonggi-do, KOREA, REPUBLIC OF                           | 15-Jan-2013            |
| 255303        | Lee, Je-Jung        | Chonnam National University Hwasun Hospital; IRB, 322, Seoyang-ro, Hwasun-eup, Hwasun-gun, 58128, Jeollanam-do, KOREA, REPUBLIC OF      | 26-Dec-2012            |
| 255348        | Shi, Qingzhi        | EC of the 2nd Affiliated Hospital of Nanchang University, No.1 Minde Road, 330008, Nanchang, CHINA                                      | 30-Jan-2013            |
| 255971        | Fu, Jinxiang        | EC of Second Affiliated Hospital of Soochow University, 1055 Sanxiang Road, 215004, Suzhou, CHINA                                       | 07-Feb-2013            |
| 256257        | ROITMAN, DARYL      | Ontario Cancer Research Ethics Board, MaRS Centre, South Tower, 101 College Street, Suite 500, M5G 1L7, Toronto, Ontario, CANADA        | 11-Mar-2013            |
| 257526        | Nagafuji, Koji      | Kurume University Institutional Review Board, 67 Asahimachi, Kurume-shi, 830-0011, Fukuoka, JAPAN                                       | 17-Apr-2013            |
| 257527        | Nakajima, Hideaki   | Yokohama City University Hospital Institutional Review Board, 3-9 Fukuura, Kanazawa-ku, Yokohama-shi, 236-0004, Kanagawa, JAPAN         | 28-Mar-2013            |
| 257528        | Nakamura, Nobuhiko  | Gifu University Hospital IRB, 1-1 Yanagido, Gifu-shi, 501-1194, Gifu, JAPAN                                                             | 15-Feb-2013            |
| 257579        | VISCO, CARLO        | Ce Per La Sperim.E Clinica Della Prov. Di Vicenza, c/o Direzione Medica, Via Rodolfi 37, 36100, Vicenza, Veneto, ITALY                  | 06-May-2013            |
| 257639        | Oyake, Tatsuo       | Iwate Medical University Institutional Review Board, 1-1-1, Idai-dori, Yahaba-cho, Shiwa-gun, 028-3600, Iwate, JAPAN                    | 22-Mar-2013            |
| 258286        | Voloshin, Sergey    | EC of Rus SPb Res Inst of Haemot and Transfusiol, 2-ND SOVETSKAYA STREET, 16, 191024, ST. PETERSBURG, RUSSIAN FEDERATION                | 22-Apr-2013            |
| 258642        | Teshima, Takanori   | Hokkaido University Hospital Institutional Review Board, Kita14-jo, Nishi5-chome, Kita-ku, Sapporo, 060-8648, Hokkaido, JAPAN           | 12-Mar-2013            |
| 258643        | Sakaida, Emiko      | Chiba University Hospital Institutional Review Board, 1-8-1 Inohana, Chuo-ku, 260-8670, Chiba, JAPAN                                    | 18-Mar-2013            |

| <b>Site #</b> | <b>Investigator</b>     | <b>EC/IRB Name and Address</b>                                                                                            | <b>IRB/EC Approval</b> |
|---------------|-------------------------|---------------------------------------------------------------------------------------------------------------------------|------------------------|
| 258644        | Nishikori, Momoko       | Kyoto University Hospital Institutional Review Board, 54 Kawahara-cho Shogoin Sakyo-ku, Kyoto-shi, 606-8507, Kyoto, JAPAN | 14-May-2013            |
| 258776        | Di Simone, Christopher  | US Oncology, Inc Institutional Review Board, 10101 Woodloch Forest, The Woodlands, TX, 77380, UNITED STATES               | 19-Apr-2013            |
| 258777        | Larson, Timothy         | US Oncology, Inc Institutional Review Board, 10101 Woodloch Forest, The Woodlands, TX, 77380, UNITED STATES               | 19-Apr-2013            |
| 258778        | GARBO, LAWRENCE         | US Oncology, Inc Institutional Review Board, 10101 Woodloch Forest, The Woodlands, TX, 77380, UNITED STATES               | 19-Apr-2013            |
| 258779        | Garrison, Mitchell      | US Oncology, Inc Institutional Review Board, 10101 Woodloch Forest, The Woodlands, TX, 77380, UNITED STATES               | 19-Apr-2013            |
| 258780        | Houck, William          | US Oncology, Inc Institutional Review Board, 10101 Woodloch Forest, The Woodlands, TX, 77380, UNITED STATES               | 19-Apr-2013            |
| 258782        | KLEIN, LEONARD          | US Oncology, Inc Institutional Review Board, 10101 Woodloch Forest, The Woodlands, TX, 77380, UNITED STATES               | 19-Apr-2013            |
| 258785        | Zweibach, Alexander     | US Oncology, Inc Institutional Review Board, 10101 Woodloch Forest, The Woodlands, TX, 77380, UNITED STATES               | 19-Apr-2013            |
| 258787        | Forero, Andres          | Western Institutional Review Board WIRB Panel 7, 1019 39th Ave S.E., Puyallup, WA, 98374, UNITED STATES                   | 18-Sep-2013            |
| 258788        | Fayad, Luis             | MD Anderson Cancer Center Office of Protocol Research, 1515 Holcombe Blvd., Box 574, Houston, TX, 77030, UNITED STATES    | 30-May-2013            |
| 258790        | Bessudo, Alberto        | Western Institutional Review Board WIRB Panel 7, 1019 39th Ave S.E., Puyallup, WA, 98374, UNITED STATES                   | 14-Jun-2013            |
| 258791        | Sharman, Jeff-Porter    | US Oncology, Inc Institutional Review Board, 10101 Woodloch Forest, The Woodlands, TX, 77380, UNITED STATES               | 19-Apr-2013            |
| 259141        | Stuart, Robert          | Western Institutional Review Board WIRB Panel 7, 1019 39th Ave S.E., Puyallup, WA, 98374, UNITED STATES                   | 30-Sep-2013            |
| 259727        | Burke, John M.          | US Oncology, Inc Institutional Review Board, 10101 Woodloch Forest, The Woodlands, TX, 77380, UNITED STATES               | 19-Apr-2013            |
| 259728        | Grosse-Perdekamp, Maria | Western Institutional Review Board WIRB Panel 7, 1019 39th Ave S.E., Puyallup, WA, 98374, UNITED STATES                   | 19-Apr-2013            |
| 259729        | Goldschmidt-Jr, Jerome  | US Oncology, Inc Institutional Review Board, 10101 Woodloch Forest, The Woodlands, TX, 77380, UNITED STATES               | 19-Apr-2013            |

| <b>Site #</b> | <b>Investigator</b>     | <b>EC/IRB Name and Address</b>                                                                                                                             | <b>IRB/EC Approval</b> |
|---------------|-------------------------|------------------------------------------------------------------------------------------------------------------------------------------------------------|------------------------|
| 259729        | Goldschmidt-Jr, Jerome  | US Oncology, Inc. Institutional Review Board, 4144 N. Central Expressway, Suite 1250, Dallas, TX, 75204, UNITED STATES                                     | 19-Apr-2013            |
| 260470        | Johnson, Nathalie       | McGill University; McGill University; Ethics Board, 3655 Promenade Sir William Osler - 6th Floor, H3G 1Y6, Montreal, Quebec, CANADA                        | 06-May-2013            |
| 261854        | PILNIK, NORMA           | Comité Independiente de Etica Fundación Rusculleda, Avenida Colon 2057, X5003DCE, Cordoba, ARGENTINA                                                       | 15-Aug-2013            |
| 262115        | Cerana Helvecia, Susana | Comite de Etica; del Sanatorio Britanico, Paraguay 40, S2000CVB, Rosario, ARGENTINA                                                                        | 25-Jun-2013            |
| 264726        | Chou, Takaaki           | Niigata Cancer Center Hospital Institutional Review Board, 2-15-3 Kawagishi-cho, Chuo-ku, Niigata-shi, 951-8566, Niigata, JAPAN                            | 11-Oct-2013            |
| 264727        | Ohmine, Ken             | Jichi Medical University Institutional Review Board, 3311-1 Yakushiji, Shimotsuke-shi, 329-0498, Tochigi, JAPAN                                            | 31-Oct-2013            |
| 264775        | Suzumiya, Junji         | Shimane University Hospital Institutional Review Board, 89-1 ENYA-CHO IZUMO-SHI, 693-8501, SHIMANE, JAPAN                                                  | 10-Oct-2013            |
| 265383        | CASANOVA, LUIS          | Comité Institucional de Etica en Investigación de la Asociación Benéfica Prisma, Carlos Gonzales #251 Urbanización Maranga San Miguel, Lima 32, Lima, PERU | 10-Oct-2013            |



**Supplementary Figure S1. NMF-defined clusters in CAVALLI and their association with cell-of-origin.**

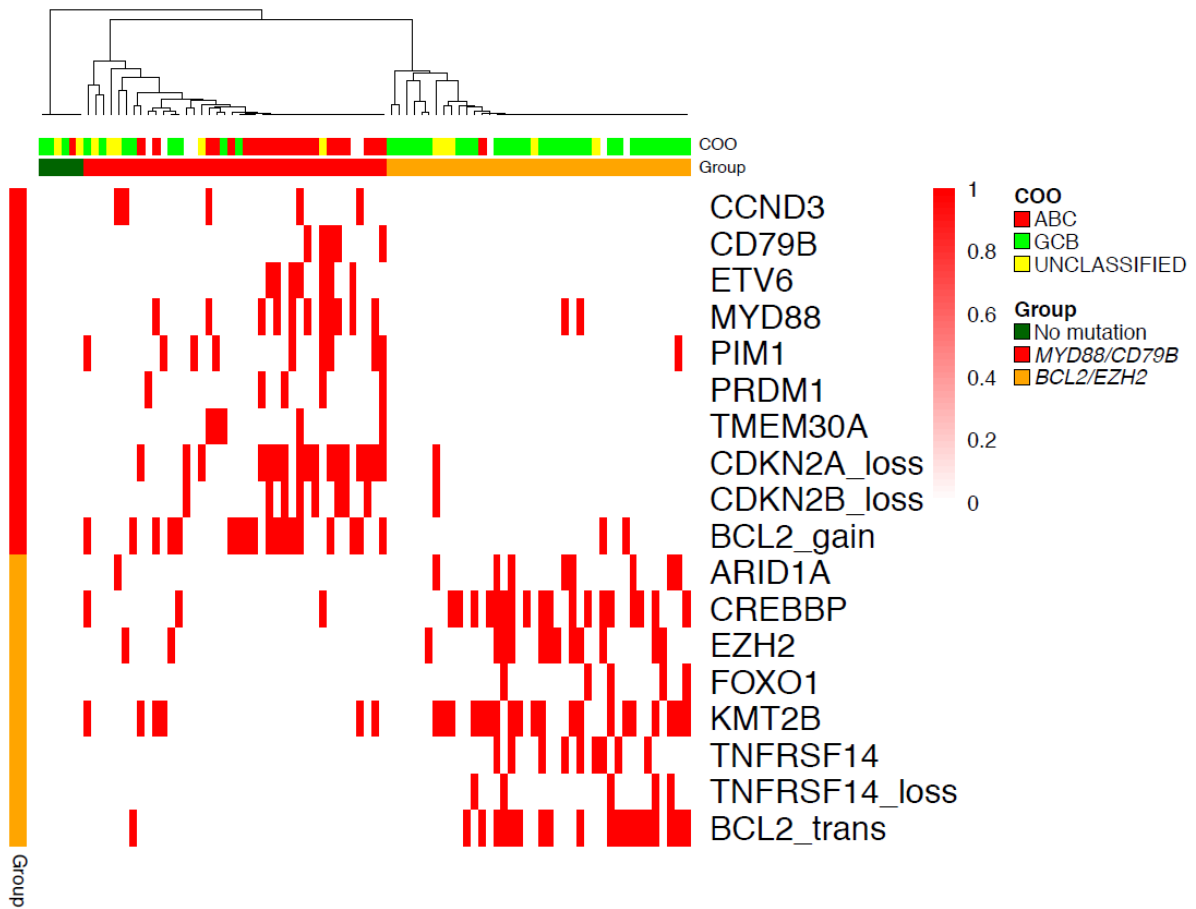

ABC, activated B-cell-like; COO, cell-of-origin; GCB, germinal center B-cell-like; NMF, non-negative matrix factorization.

**Supplementary Figure S2. Kaplan-Meier curves of PFS for NMF high- and low-risk prognostic groups in GOYA according to (A) treatment and (B) cell-of-origin (activated B-cell-like vs germinal center B-cell-like).**

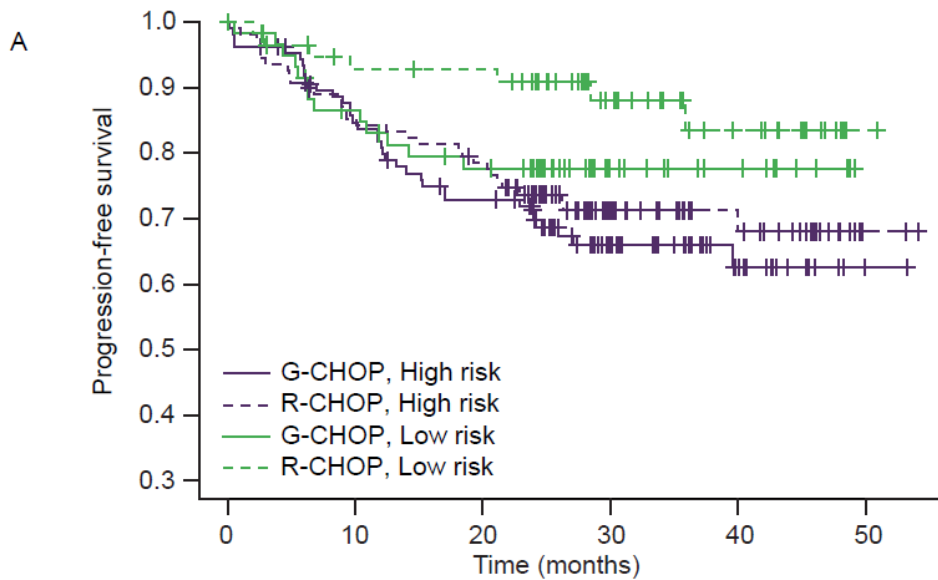

|                   | No. at risk |    |    |    |    |   |
|-------------------|-------------|----|----|----|----|---|
| G-CHOP, High risk | 111         | 87 | 73 | 37 | 16 | 1 |
| R-CHOP, High risk | 111         | 90 | 82 | 42 | 22 | 2 |
| G-CHOP, Low risk  | 62          | 50 | 43 | 18 | 11 | 0 |
| R-CHOP, Low risk  | 59          | 50 | 49 | 29 | 15 | 1 |

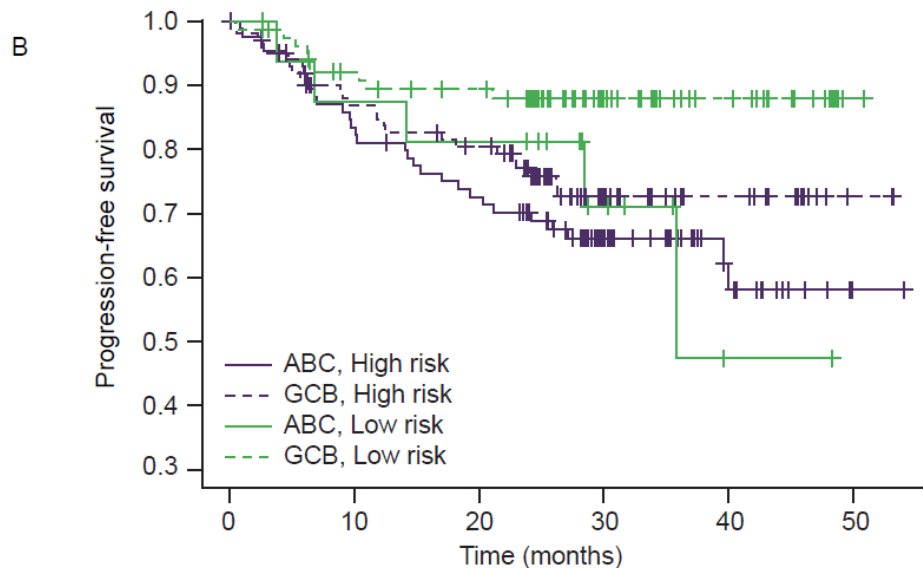

|                | No. at risk |    |    |    |    |   |
|----------------|-------------|----|----|----|----|---|
| ABC, High risk | 87          | 70 | 60 | 33 | 15 | 1 |
| GCB, High risk | 104         | 82 | 74 | 33 | 17 | 2 |
| ABC, Low risk  | 18          | 14 | 13 | 6  | 1  | 0 |
| GCB, Low risk  | 78          | 67 | 62 | 33 | 19 | 1 |

ABC, activated B-cell-like; G-CHOP, obinutuzumab plus cyclophosphamide, doxorubicin, vincristine and prednisone; GCB, germinal center B-cell-like; NMF, non-negative matrix factorization; PFS, progression-free survival; R-CHOP, rituximab plus cyclophosphamide, doxorubicin, vincristine and prednisone.

**Supplementary Figure S3. Kaplan-Meier curve of PFS for the *BCL2/EZH2* versus *MYD88/CD798* clusters in CAVALLI (*de novo* NMF clustering).**

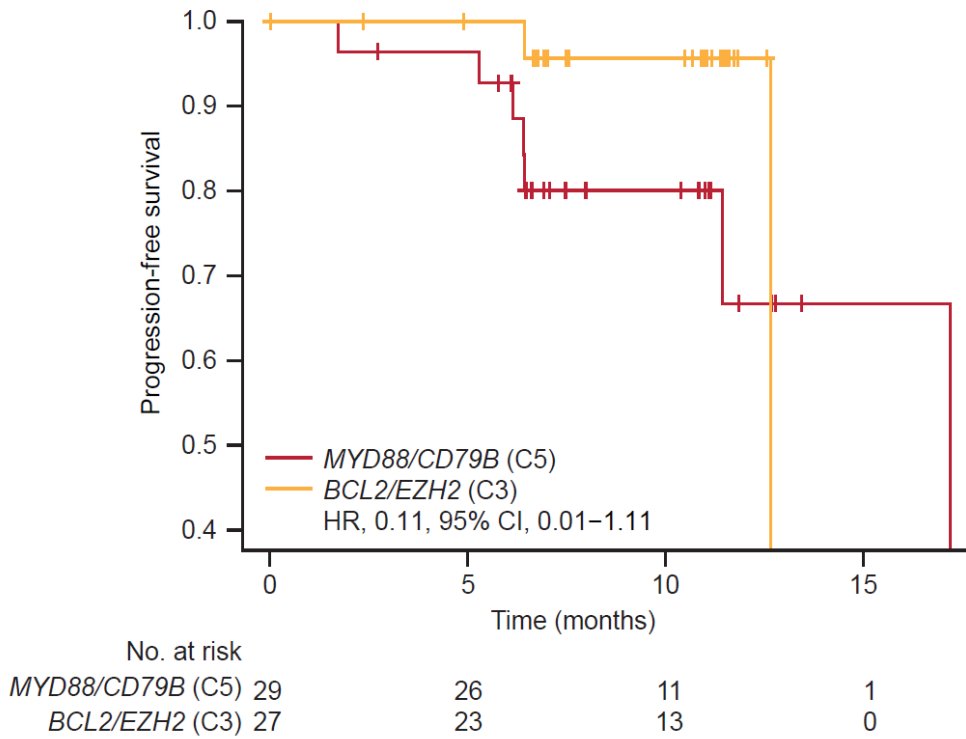

CI, confidence interval; HR, hazard ratio; NMF, non-negative matrix factorization; PFS, progression-free survival.

**Supplementary Figure S4. Training of a Random Forest model on NMF cluster labels**

**in GOYA onto CAVALLI.** (A) Clustering of gene features of predicted GOYA NMF groups

onto CAVALLI. (B) Kaplan-Meier curves of PFS for predicted GOYA NMF groups in

CAVALLI.

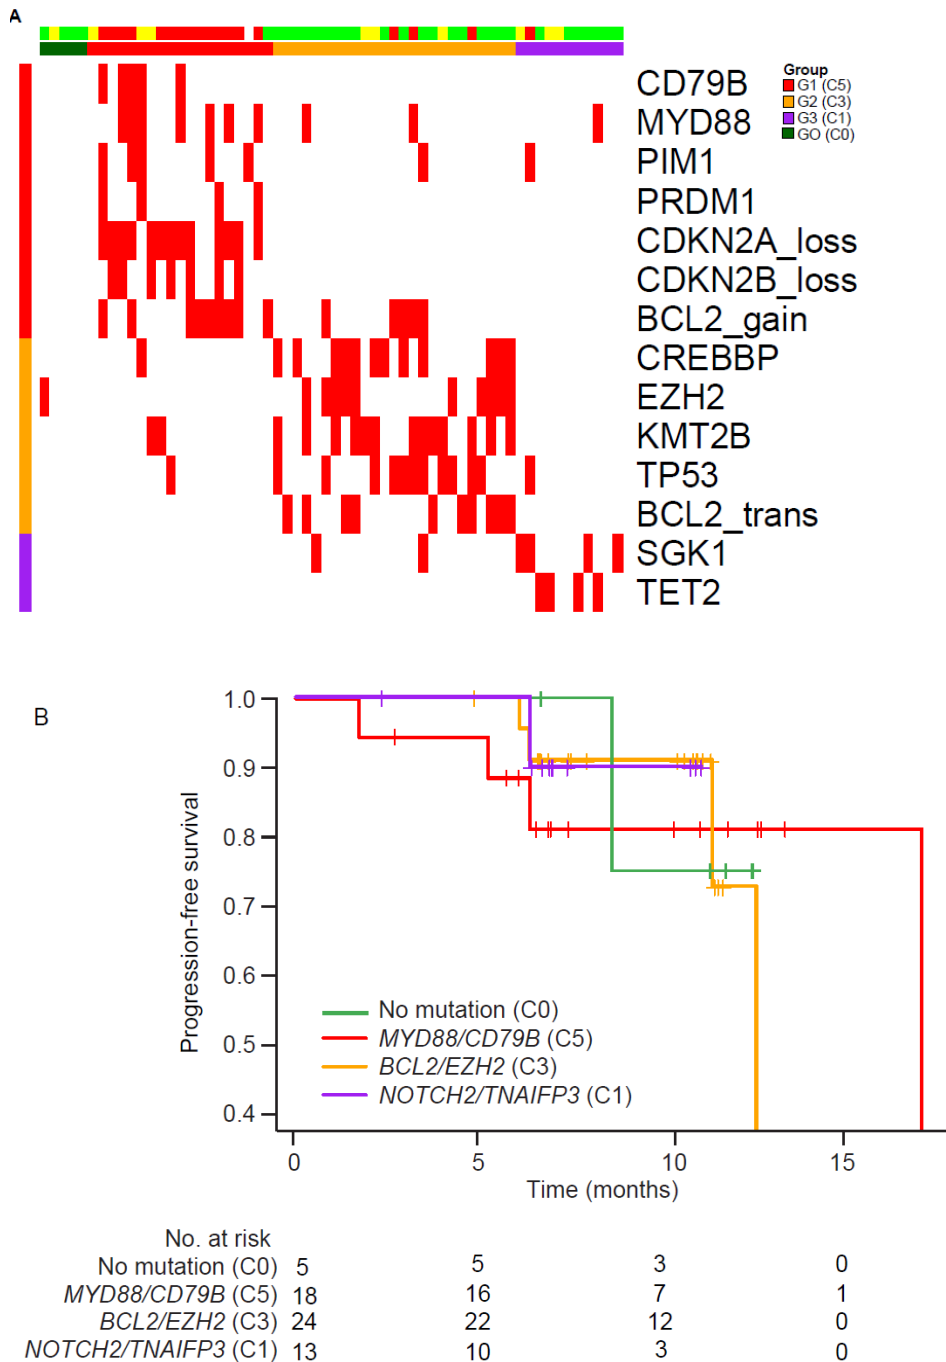

NMF, non-negative matrix factorization; PFS, progression-free survival.

**Supplementary Figure S5. Kaplan-Meier curves of PFS for GOYA and CAVALLI**

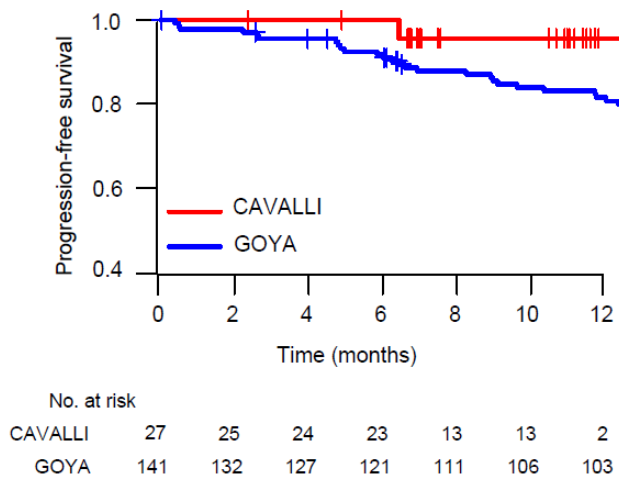

PFS, progression-free survival.

**Supplementary Figure S6. Differential expression and pathway analysis of NMF high-risk vs low-risk patients in GOYA.** (A) Volcano plot of all genes for patients with NMF risk categorization and RNA-Seq data. Limma was used to determine differential expression with no covariate adjustment. Labelled points outside of the red dotted lines indicate genes with a false discovery rate  $<0.05$  (Benjamini-Hochberg) and log-fold change  $>1$ . (B) Pathways with false discovery rate  $<0.05$  using fast gene set enrichment analysis. tStat values from Limma were used along with the mSigDB Hallmark signature list. (C) Top 30 ranked normalized enrichment scores for Staudt Signature database. All signatures have adjusted p-values with a false discovery rate  $<0.05$ . (D) Additional signature sets from MSigDB.

**A**

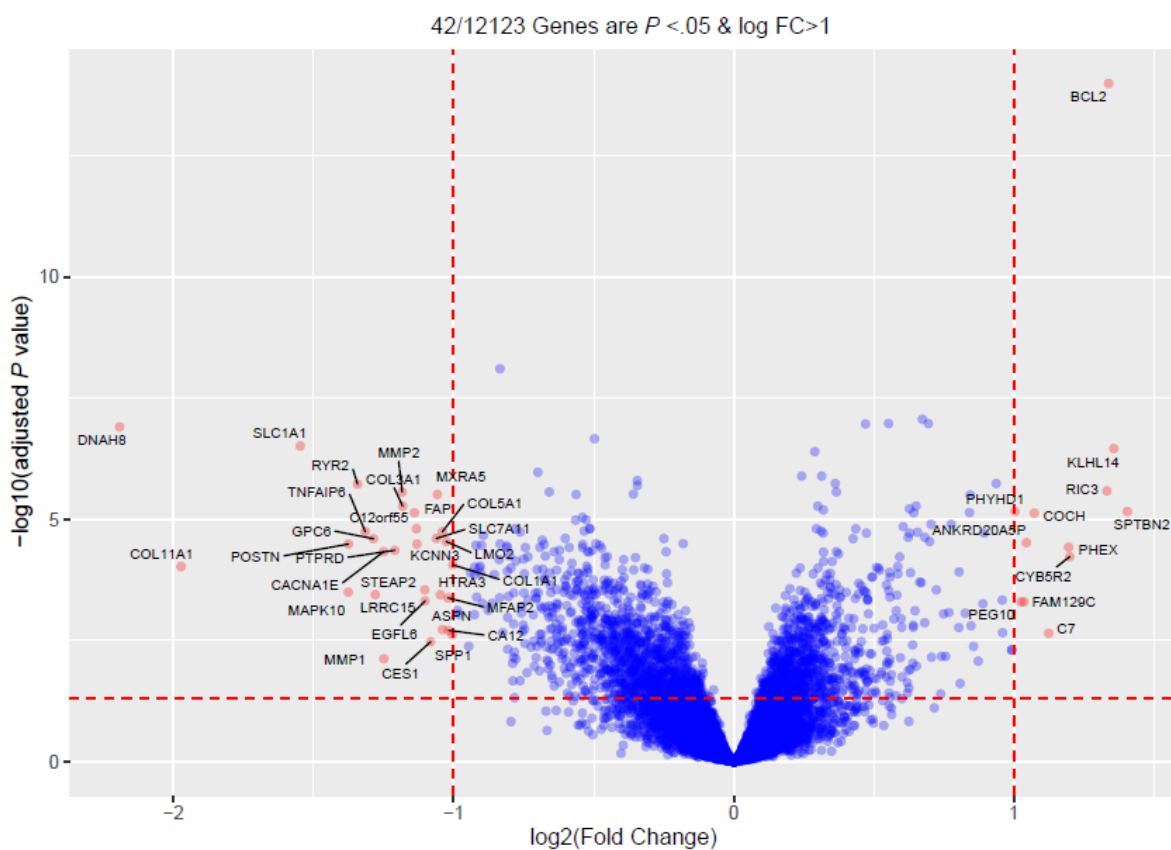

**B**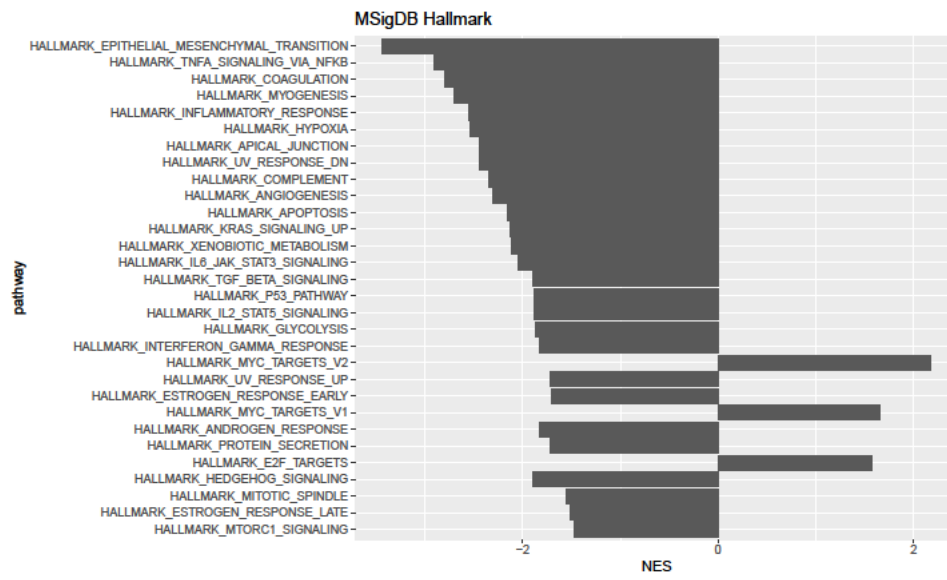**C**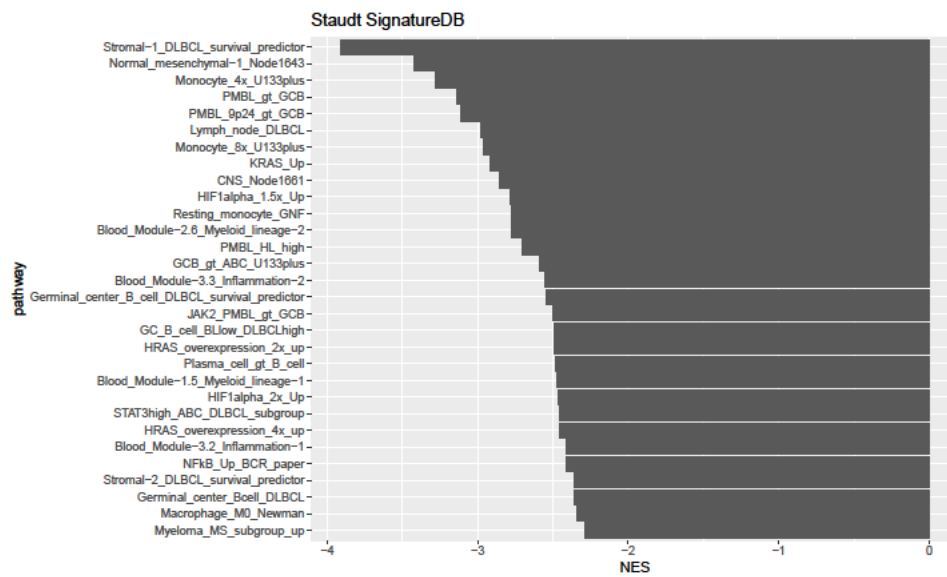



D

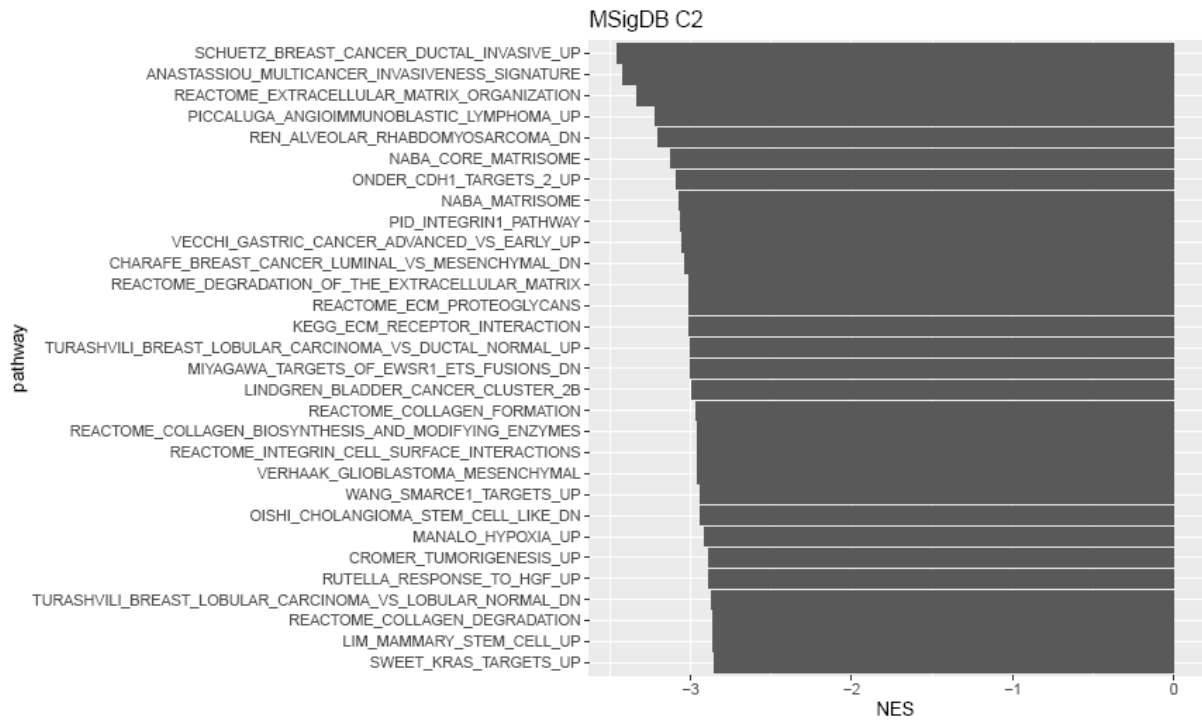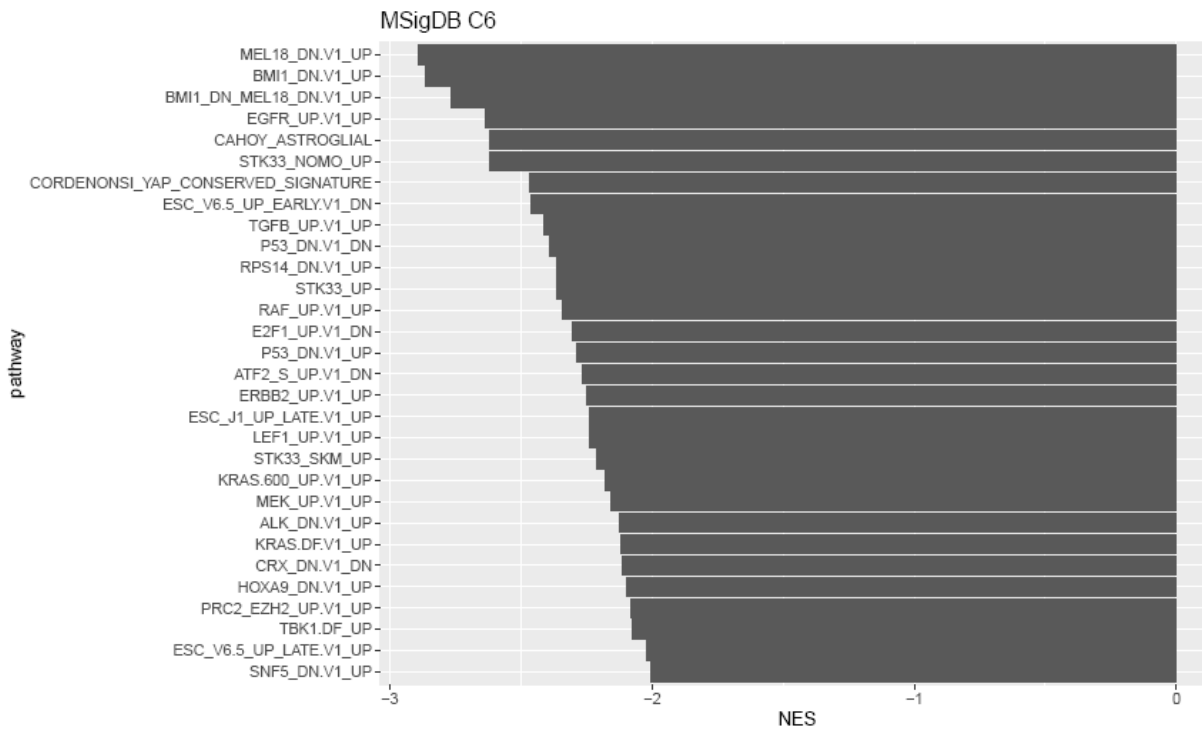

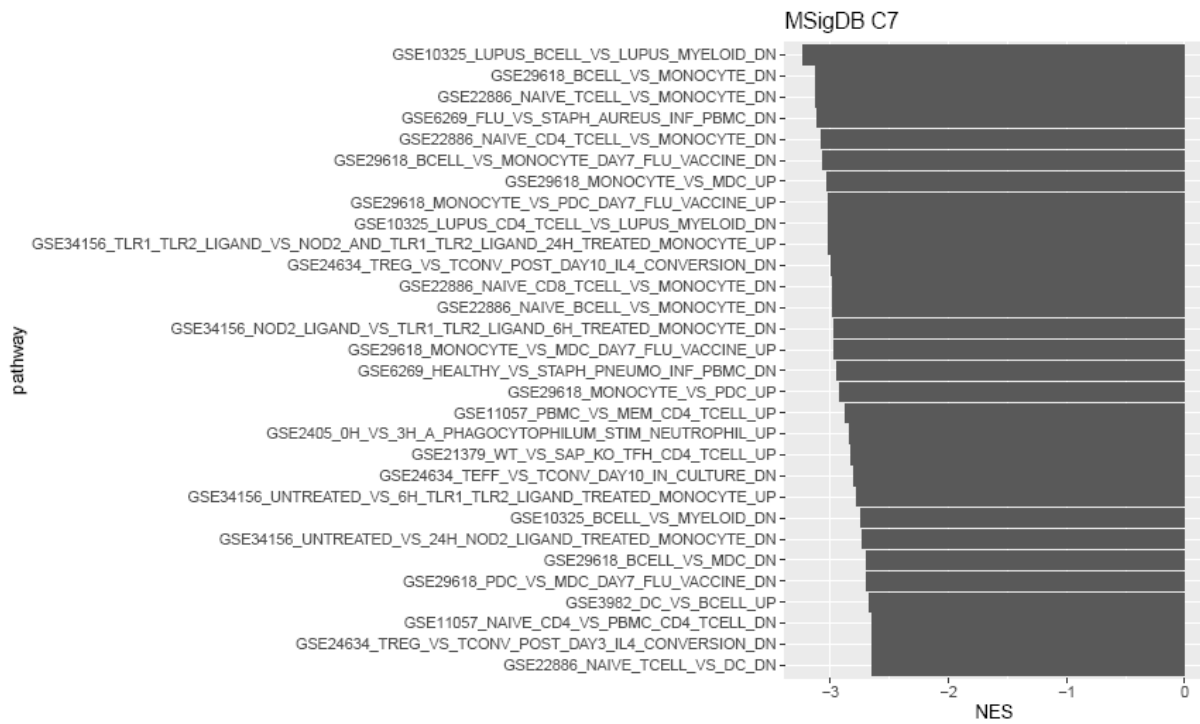

mSigDB, Molecular Signature Database; NES, normalized enrichment score; NMF, non-negative matrix factorization

## References

1. Wright G, Tan B, Rosenwald A, Hurt EH, Wiestner A, Staudt LM. A gene expression-based method to diagnose clinically distinct subgroups of diffuse large B cell lymphoma. *Proc Natl Acad Sci U S A*. 2003;100(17):9991-9996.
2. Pfeifer M, Grau M, Lenze D, et al. PTEN loss defines a PI3K/AKT pathway-dependent germinal center subtype of diffuse large B-cell lymphoma. *Proc Natl Acad Sci U S A*. 2013;110(30):12420-12425.
3. Lenz G, Wright G, Dave SS, et al. Stromal gene signatures in large-B-cell lymphomas. *N Engl J Med*. 2008;359(22):2313-2323.
4. Shaffer AL, Wright G, Yang L, et al. A library of gene expression signatures to illuminate normal and pathological lymphoid biology. *Immunol Rev*. 2006;210:67-85.
